# Supplementary material for: Don’t forget the trans: double bond isomerism radical-acetylene growth reactions affect the primary stages of PAH and soot formation
Source: Royal Society of Chemistry journal article supplement (doi:10.1039/d4cp03554b), 2024-11-28
Supplement: d4cp03554b1.pdf [file d4cp03554b1.pdf]

## Supporting Information for:

### **Don't forget the *trans*: Double-bond isomerism in radical-acetylene growth reactions affects the primary stages of PAH and soot formation**

Patricia D. Kelly<sup>a</sup>, Jack A. Turner<sup>a</sup>, Oisín J. Shiels<sup>a</sup>, Gabriel da Silva<sup>b</sup>, Stephen J. Blanksby<sup>c</sup>,  
Berwyck L. J. Poad<sup>c</sup> and Adam J. Trevitt<sup>a</sup>

<sup>a</sup> School of Chemistry and Molecular Bioscience, University of Wollongong, Wollongong, NSW, Australia

<sup>b</sup> Department of Chemical Engineering, The University of Melbourne, Melbourne, Victoria, Australia

<sup>c</sup> Central Analytical Research Facility and the School of Chemistry and Physics, Queensland University of Technology,  
Brisbane, Queensland, Australia

email: [adamt@uow.edu.au](mailto:adamt@uow.edu.au)

## SUPPORTING INFORMATION

### Future Experimental Verification of C<sub>10</sub>H<sub>8</sub> Isomer Diversity

The models presented here predict the formation of multiple C<sub>10</sub>H<sub>8</sub> isomers in addition to naphthalene, and this provides a target for experiments to detect their presence in the Bittner-Howard reaction. The authors have performed mass spectrometric experiments of the reaction at the Chemical Dynamics Beamline at the Advanced Light Source in Berkeley, California near the low temperature and pressure limits of this study, using the methods described in [44]. These experiments are to be the subject of a future publication on the Bittner-Howard reaction. Unfortunately, the experiments were unable to conclusively verify the presence of multiple C<sub>10</sub>H<sub>8</sub> isomers, which is believed to be for two main reasons. Firstly, the achievable limits of pressure and temperature imposed by the apparatus are at the very low end of the model, at 4 Torr and 550-700 K. This region of the model is one of the few that predicts very little C<sub>10</sub>H<sub>8</sub> isomerism, with the vast majority of the branching ratio attributed to naphthalene.

Secondly, unlike azulene [26], the ionisation energies of the most common predicted C<sub>10</sub>H<sub>8</sub> isomers are very similar to that of naphthalene, as presented in Table S1. The resolution of the instrument combined with the gradual onset of ionisation as energy increases prevents conclusive assignment of the C<sub>10</sub>H<sub>8</sub> signal. Future experiments with greater precision in detecting the ionisation energy of these reaction products, such as PEPICO, will be vital in verifying or refuting the model presented in this study.

**Table S1.** CBS-QB3 adiabatic ionisation energies for the five significant C<sub>10</sub>H<sub>8</sub> species predicted by the model.

| Species       | Adiabatic Ionisation Energy (eV) |
|---------------|----------------------------------|
| BZFB          | 8.11                             |
| NAPH          | 8.17                             |
| <i>E</i> -EPE | 8.21                             |
| PVAC          | 8.22                             |
| <i>Z</i> -EPE | 8.26                             |

**Table S2.** M06-2X and G3X-K energies for all intermediates, products and transition states included in the model. Labels for each stationary point are as listed in Figure 2. All energies are in kcal/mol, with the Z- $\beta$ -styryl radical (Z- $\beta$ S) chosen as the reference energy.

| Well         | M06-2X | G3X-K  | Well         | M06-2X | G3X-K  | Well                         | M06-2X | G3X-K  |
|--------------|--------|--------|--------------|--------|--------|------------------------------|--------|--------|
| <i>E-i1</i>  | -43.54 | -39.69 | <b>Z-i15</b> | -40.55 | -38.13 | <b>i38</b>                   | -60.05 | -55.13 |
| <b>Z-i1</b>  | -43.07 | -38.95 | <b>i16</b>   | -32.25 | -23.60 | <b>i39</b>                   | -86.34 | -83.16 |
| <i>E-i2</i>  | -41.10 | -38.68 | <b>i24</b>   | -4.25  | -4.50  | <b>i40</b>                   | -39.57 | -36.64 |
| <b>Z-i2</b>  | -40.73 | -37.96 | <b>i25</b>   | -70.16 | -65.71 | <b>i41</b>                   | -51.06 | -48.43 |
| <b>i4</b>    | -54.45 | -50.95 | <b>i26</b>   | -63.24 | -62.16 | <b>i42</b>                   | -84.04 | -79.86 |
| <b>i5</b>    | -68.86 | -66.97 | <b>i27</b>   | -78.28 | -69.67 | <b>i45</b>                   | -96.44 | -90.75 |
| <b>i6</b>    | -50.19 | -48.45 | <b>i28</b>   | -90.09 | -85.61 | <b>E-<math>\beta</math>S</b> | 0.00   | -0.97  |
| <b>i7</b>    | -43.98 | -38.99 | <b>i29</b>   | -62.21 | -55.93 | <b>Z-<math>\beta</math>S</b> | 0.00   | 0.00   |
| <b>i8</b>    | -42.51 | -37.72 | <b>i31</b>   | -35.47 | -27.37 | <b>p1</b>                    | -1.09  | 0.10   |
| <b>i9</b>    | -94.84 | -90.24 | <b>E-i32</b> | -41.41 | -39.18 | <b>p2</b>                    | -66.64 | -61.45 |
| <b>i10</b>   | -59.86 | -56.35 | <b>Z-i32</b> | -40.12 | -37.69 | <b>p3</b>                    | -10.05 | -7.19  |
| <b>i11</b>   | -58.67 | -54.99 | <b>i33</b>   | -19.60 | -13.73 | <b>p4</b>                    | -12.04 | -8.71  |
| <b>i12</b>   | -45.69 | -42.39 | <b>i34</b>   | -21.42 | -21.37 | <b>p5</b>                    | -5.55  | -1.22  |
| <b>i13</b>   | -50.12 | -45.87 | <b>i35</b>   | -24.90 | -23.65 | <b>p6</b>                    | -9.26  | -6.43  |
| <b>i14</b>   | -21.96 | -17.01 | <b>i36</b>   | -40.85 | -38.50 | <b>p8</b>                    | -43.44 | -40.07 |
| <b>E-i15</b> | -40.06 | -37.80 | <b>i37</b>   | -42.43 | -37.59 | <b>p10</b>                   | -9.37  | -6.91  |

| TS         | ...connects... |      | M06-2X | G3X-K  | TS         | ...connects... |       | M06-2X | G3X-K  |
|------------|----------------|------|--------|--------|------------|----------------|-------|--------|--------|
| <b>t1</b>  | Z- $\beta$ S   | Z-i1 | 4.05   | 3.48   | <b>t45</b> | i4             | i10   | -5.96  | 0.50   |
| <b>t2</b>  | E- $\beta$ S   | Z-i2 | 3.79   | 3.17   | <b>t46</b> | E-i15          | Z-i15 | -35.70 | -33.62 |
| <b>t3</b>  | E-i1           | Z-i1 | -39.10 | -35.98 | <b>t64</b> | i24            | p1    | N/A    | N/A    |
| <b>t4</b>  | E-i2           | Z-i2 | -36.57 | -34.72 | <b>t65</b> | i8             | i25   | -33.95 | -32.87 |
| <b>t5</b>  | E-i1           | i4   | 1.40   | 5.42   | <b>t66</b> | i11            | i26   | -31.85 | -31.27 |
| <b>t6</b>  | E-i2           | i4   | 3.01   | 6.45   | <b>t67</b> | i25            | p8    | -36.95 | -35.13 |
| <b>t8</b>  | i4             | i24  | -0.73  | -0.56  | <b>t68</b> | i26            | p8    | -36.64 | -35.62 |
| <b>t9</b>  | E-i2           | i5   | -32.81 | -30.82 | <b>t69</b> | i10            | p5    | -1.22  | 5.43   |
| <b>t10</b> | i5             | p2   | -54.95 | -50.77 | <b>t70</b> | i25            | i27   | -61.84 | -58.58 |
| <b>t11</b> | E-i1           | i6   | -13.38 | -11.87 | <b>t71</b> | i27            | i28   | -60.29 | -56.79 |

|            |       |       |        |        |             |       |       |        |         |
|------------|-------|-------|--------|--------|-------------|-------|-------|--------|---------|
| <b>t12</b> | i4    | i6    | -2.42  | 2.38   | <b>t72</b>  | i28   | p2    | -60.76 | -53.55  |
| <b>t13</b> | Z-i1  | Z-i2  | 0.14   | 6.52   | <b>t73</b>  | i25   | i29   | -55.90 | -52.18  |
| <b>t14</b> | E-i1  | E-i2  | 10.14  | 13.77  | <b>t74</b>  | i9    | i29   | -55.76 | -51.39  |
| <b>t15</b> | E-i1  | p3    | -4.21  | -5.24  | <b>t76</b>  | i25   | i26   | -43.48 | -39.04  |
| <b>t16</b> | i6    | p4    | -7.67  | -6.17  | <b>t77</b>  | E-i2  | i31   | -19.32 | -17.34  |
| <b>t17</b> | i4    | p4    | -7.42  | -5.26  | <b>t78</b>  | E-i1  | i31   | -20.66 | -18.90  |
| <b>t18</b> | i4    | p5    | -0.27  | 6.75   | <b>t79</b>  | i25   | E-i32 | -36.48 | -36.31  |
| <b>t20</b> | i7    | i8    | 5.78   | 8.77   | <b>t80</b>  | E-i32 | Z-i32 | -37.00 | -35.38  |
| <b>t21</b> | i8    | i9    | -35.54 | -32.49 | <b>t81</b>  | i28   | E-i32 | -35.13 | -33.22  |
| <b>t22</b> | i9    | p2    | -61.63 | -56.75 | <b>t82</b>  | E-i32 | p10   | -2.60  | -1.50   |
| <b>t23</b> | Z-i1  | i10   | -0.75  | 3.06   | <b>t83</b>  | E-i32 | i33   | -14.07 | -12.05  |
| <b>t24</b> | Z-i2  | i11   | -0.03  | 4.33   | <b>t84</b>  | E-i32 | i34   | -2.00  | -2.47   |
| <b>t25</b> | i10   | i11   | -50.06 | -48.04 | <b>t85</b>  | E-i32 | i35   | -6.41  | -5.74   |
| <b>t26</b> | i8    | i11   | -32.04 | -28.53 | <b>t86</b>  | E-i15 | i36   | -13.36 | -12.63  |
| <b>t27</b> | E-i2  | i8    | -31.42 | -29.86 | <b>t87</b>  | i36   | i37   | -22.32 | -20.21  |
| <b>t30</b> | E-i1  | i13   | -14.23 | -11.63 | <b>t88</b>  | i36   | i38   | -12.65 | -11.38  |
| <b>t31</b> | E-i2  | i13   | -6.56  | -3.87  | <b>t89</b>  | i36   | i39   | -28.16 | -28.53  |
| <b>t32</b> | i10   | p3    | -7.20  | -4.95  | <b>t90</b>  | E-i32 | i40   | -13.12 | -12.29  |
| <b>t33</b> | i11   | p6    | -6.53  | -5.48  | <b>t91</b>  | E-i32 | i41   | -31.45 | -30.85  |
| <b>t34</b> | E-i2  | p6    | -2.56  | -2.63  | <b>t92</b>  | i41   | i42   | -32.94 | -31.23  |
| <b>t35</b> | i7    | i12   | -8.60  | -6.75  | <b>t93</b>  | i42   | p8    | -40.25 | -37.70  |
| <b>t36</b> | i8    | i12   | -5.03  | -3.42  | <b>t94</b>  | i37   | i39   | -23.39 | -19.08  |
| <b>t37</b> | i4    | i11   | -5.22  | 2.01   | <b>t95</b>  | i37   | i42   | -24.16 | -20.84  |
| <b>t39</b> | Z-i15 | i24   | 3.00   | 1.85   | <b>t98</b>  | i39   | i42   | -52.01 | -46.60  |
| <b>t40</b> | i14   | E-i15 | -17.08 | -16.24 | <b>t99</b>  | i39   | p8    | -40.25 | -38.68  |
| <b>t41</b> | i4    | i14   | -18.71 | -15.48 | <b>t100</b> | i37   | i41   | -26.15 | -25.00  |
| <b>t42</b> | i4    | i7    | -17.97 | -16.29 | <b>t101</b> | i25   | i42   | -47.14 | -42.40  |
| <b>t43</b> | Z-i15 | i16   | -20.97 | -19.42 | <b>t102</b> | i25   | i45   | -45.81 | -41.51  |
| <b>t44</b> | i6    | i16   | -23.77 | -19.22 | <b>t103</b> | i45   | p8    | -42.09 | -41.36* |

\* this step has a submerged barrier with G3X-K energies, though not with M06-2X energies. No post-reactive complex was locatable, so t103 was treated as a zero-height barrier from the isolated products (-40.07 kcal/mol). This approximation was deemed sufficient as the flux across t103 was low.

**Table S3.** Branching ratios for all 48 species under all 30 sets of temperature and pressure conditions. *trans*, *cis* and the weighted average of these are each listed.

| T<br>(K)        | P<br>(Pa)       | iso          | E-i1         | Z-i1    | E-i2    | Z-i2    | i4      | i5      | i6      | i7      | i8      | i9      | i10     | i11     | i12     | i13     | i14     | E-i15   |         |
|-----------------|-----------------|--------------|--------------|---------|---------|---------|---------|---------|---------|---------|---------|---------|---------|---------|---------|---------|---------|---------|---------|
| 550             | 533             | <i>trans</i> | 3.71E-5      | 2.18E-5 | 0.00E+0 | 0.00E+0 | 6.86E-3 | 0.00E+0 | 2.89E-2 | 5.60E-6 | 0.00E+0 | 0.00E+0 | 7.00E-7 | 1.00E-7 | 4.60E-6 | 3.43E-3 | 0.00E+0 | 3.15E-5 |         |
|                 |                 | <i>cis</i>   | 0.00E+0      | 2.00E-7 | 0.00E+0 | 0.00E+0 | 1.18E-4 | 0.00E+0 | 3.65E-4 | 0.00E+0 | 0.00E+0 | 0.00E+0 | 0.00E+0 | 0.00E+0 | 0.00E+0 | 2.00E-7 | 3.89E-5 | 0.00E+0 | 3.00E-7 |
|                 |                 | <i>mix</i>   | 2.17E-5      | 1.29E-5 | 0.00E+0 | 0.00E+0 | 4.07E-3 | 0.00E+0 | 1.71E-2 | 3.28E-6 | 0.00E+0 | 0.00E+0 | 4.10E-7 | 5.86E-8 | 2.78E-6 | 2.03E-3 | 0.00E+0 | 1.86E-5 |         |
|                 | 10 <sup>4</sup> | <i>trans</i> | 4.97E-2      | 3.07E-2 | 6.00E-7 | 3.00E-7 | 1.06E-3 | 0.00E+0 | 4.49E-2 | 2.90E-6 | 0.00E+0 | 2.63E-5 | 1.54E-3 | 4.90E-4 | 1.00E-7 | 8.86E-3 | 0.00E+0 | 1.22E-4 |         |
|                 |                 | <i>cis</i>   | 4.07E-4      | 2.55E-4 | 0.00E+0 | 0.00E+0 | 2.85E-5 | 0.00E+0 | 7.58E-4 | 0.00E+0 | 0.00E+0 | 5.70E-6 | 1.08E-3 | 3.30E-4 | 2.00E-7 | 1.57E-4 | 0.00E+0 | 2.70E-6 |         |
|                 |                 | <i>mix</i>   | 2.93E-2      | 1.81E-2 | 3.52E-7 | 1.76E-7 | 6.36E-4 | 0.00E+0 | 2.66E-2 | 1.70E-6 | 0.00E+0 | 1.78E-5 | 1.35E-3 | 4.24E-4 | 1.41E-7 | 5.26E-3 | 0.00E+0 | 7.25E-5 |         |
|                 | 10 <sup>5</sup> | <i>trans</i> | 3.72E-1      | 2.33E-1 | 5.20E-6 | 2.60E-6 | 5.32E-5 | 8.00E-7 | 2.01E-2 | 1.00E-7 | 3.00E-7 | 3.35E-3 | 6.93E-3 | 2.33E-3 | 1.00E-7 | 4.29E-3 | 0.00E+0 | 8.03E-5 |         |
|                 |                 | <i>cis</i>   | 4.71E-3      | 2.97E-3 | 1.00E-7 | 0.00E+0 | 1.40E-6 | 0.00E+0 | 4.01E-4 | 0.00E+0 | 0.00E+0 | 4.14E-3 | 1.89E-2 | 6.11E-3 | 0.00E+0 | 9.46E-5 | 0.00E+0 | 1.40E-6 |         |
|                 |                 | <i>mix</i>   | 2.20E-1      | 1.38E-1 | 3.09E-6 | 1.52E-6 | 3.18E-5 | 4.69E-7 | 1.20E-2 | 5.86E-8 | 1.76E-7 | 3.68E-3 | 1.19E-2 | 3.89E-3 | 5.86E-8 | 2.55E-3 | 0.00E+0 | 4.77E-5 |         |
|                 | 10 <sup>6</sup> | <i>trans</i> | 5.77E-1      | 3.63E-1 | 1.39E-5 | 1.03E-5 | 3.00E-7 | 2.60E-6 | 3.16E-3 | 0.00E+0 | 2.00E-7 | 5.58E-3 | 1.69E-3 | 5.90E-4 | 0.00E+0 | 6.81E-4 | 0.00E+0 | 5.40E-6 |         |
|                 |                 | <i>cis</i>   | 7.87E-3      | 4.99E-3 | 9.00E-7 | 1.30E-6 | 0.00E+0 | 3.00E-7 | 6.98E-5 | 0.00E+0 | 0.00E+0 | 9.66E-2 | 3.21E-2 | 1.05E-2 | 2.00E-7 | 1.70E-5 | 0.00E+0 | 3.00E-7 |         |
|                 |                 | <i>mix</i>   | 3.42E-1      | 2.15E-1 | 8.52E-6 | 6.58E-6 | 1.76E-7 | 1.65E-6 | 1.88E-3 | 0.00E+0 | 1.17E-7 | 4.32E-2 | 1.43E-2 | 4.70E-3 | 8.28E-8 | 4.06E-4 | 0.00E+0 | 3.29E-6 |         |
|                 | 10 <sup>7</sup> | <i>trans</i> | 6.10E-1      | 3.84E-1 | 3.90E-4 | 2.54E-4 | 0.00E+0 | 2.20E-4 | 3.36E-4 | 0.00E+0 | 7.00E-6 | 8.08E-4 | 1.41E-4 | 4.86E-5 | 0.00E+0 | 6.88E-5 | 0.00E+0 | 1.00E-7 |         |
|                 |                 | <i>cis</i>   | 4.86E-3      | 3.09E-3 | 4.80E-2 | 3.15E-2 | 0.00E+0 | 3.11E-2 | 3.60E-6 | 0.00E+0 | 7.83E-4 | 1.39E-1 | 2.57E-2 | 8.90E-3 | 0.00E+0 | 1.90E-6 | 0.00E+0 | 0.00E+0 |         |
|                 |                 | <i>mix</i>   | 3.59E-1      | 2.26E-1 | 2.01E-2 | 1.32E-2 | 0.00E+0 | 1.30E-2 | 1.98E-4 | 0.00E+0 | 3.28E-4 | 5.78E-2 | 1.07E-2 | 3.71E-3 | 0.00E+0 | 4.11E-5 | 0.00E+0 | 5.86E-8 |         |
|                 | 800             | 533          | <i>trans</i> | 6.00E-7 | 4.00E-7 | 0.00E+0 | 0.00E+0 | 2.33E-3 | 0.00E+0 | 2.67E-3 | 3.50E-6 | 0.00E+0 | 0.00E+0 | 0.00E+0 | 0.00E+0 | 4.30E-6 | 1.02E-4 | 0.00E+0 | 5.10E-6 |
|                 |                 |              | <i>cis</i>   | 0.00E+0 | 0.00E+0 | 0.00E+0 | 0.00E+0 | 5.27E-5 | 0.00E+0 | 4.80E-5 | 0.00E+0 | 0.00E+0 | 0.00E+0 | 0.00E+0 | 0.00E+0 | 1.00E-7 | 1.10E-6 | 0.00E+0 | 0.00E+0 |
|                 |                 |              | <i>mix</i>   | 3.42E-7 | 2.28E-7 | 0.00E+0 | 0.00E+0 | 1.35E-3 | 0.00E+0 | 1.54E-3 | 1.99E-6 | 0.00E+0 | 0.00E+0 | 0.00E+0 | 0.00E+0 | 2.49E-6 | 5.85E-5 | 0.00E+0 | 2.90E-6 |
| 10 <sup>4</sup> |                 | <i>trans</i> | 3.12E-4      | 2.22E-4 | 0.00E+0 | 1.00E-7 | 6.15E-3 | 0.00E+0 | 3.02E-2 | 1.40E-5 | 0.00E+0 | 1.00E-7 | 1.51E-5 | 5.60E-6 | 7.40E-6 | 3.74E-3 | 0.00E+0 | 7.31E-5 |         |
|                 |                 | <i>cis</i>   | 3.90E-6      | 1.60E-6 | 0.00E+0 | 0.00E+0 | 2.58E-4 | 0.00E+0 | 9.78E-4 | 7.00E-7 | 0.00E+0 | 1.00E-7 | 6.50E-6 | 2.30E-6 | 8.00E-7 | 1.11E-4 | 0.00E+0 | 1.80E-6 |         |
|                 |                 | <i>mix</i>   | 1.79E-4      | 1.27E-4 | 0.00E+0 | 5.69E-8 | 3.61E-3 | 0.00E+0 | 1.76E-2 | 8.27E-6 | 0.00E+0 | 1.00E-7 | 1.14E-5 | 4.18E-6 | 4.56E-6 | 2.18E-3 | 0.00E+0 | 4.24E-5 |         |
| 10 <sup>5</sup> |                 | <i>trans</i> | 3.46E-2      | 2.42E-2 | 1.08E-5 | 9.90E-6 | 2.54E-3 | 1.30E-6 | 5.88E-2 | 1.33E-5 | 4.00E-7 | 2.96E-4 | 3.20E-3 | 1.29E-3 | 2.40E-6 | 1.22E-2 | 0.00E+0 | 2.39E-4 |         |
|                 |                 | <i>cis</i>   | 7.65E-4      | 5.40E-4 | 2.00E-7 | 3.00E-7 | 1.64E-4 | 1.00E-7 | 2.59E-3 | 5.00E-7 | 0.00E+0 | 7.06E-5 | 2.79E-3 | 1.06E-3 | 1.30E-6 | 5.49E-4 | 0.00E+0 | 9.50E-6 |         |
|                 |                 | <i>mix</i>   | 2.00E-2      | 1.40E-2 | 6.23E-6 | 5.76E-6 | 1.52E-3 | 7.83E-7 | 3.46E-2 | 7.79E-6 | 2.28E-7 | 1.99E-4 | 3.02E-3 | 1.19E-3 | 1.93E-6 | 7.19E-3 | 0.00E+0 | 1.40E-4 |         |
| 10 <sup>6</sup> |                 | <i>trans</i> | 3.14E-1      | 2.24E-1 | 2.03E-4 | 1.72E-4 | 1.92E-4 | 2.87E-5 | 3.37E-2 | 9.00E-7 | 9.90E-6 | 1.07E-2 | 1.13E-2 | 4.69E-3 | 9.00E-7 | 8.40E-3 | 0.00E+0 | 1.92E-4 |         |
|                 |                 | <i>cis</i>   | 1.14E-2      | 8.16E-3 | 8.50E-6 | 6.50E-6 | 2.11E-5 | 1.10E-6 | 1.81E-3 | 1.00E-7 | 2.00E-7 | 1.80E-2 | 2.81E-2 | 1.13E-2 | 1.90E-6 | 5.08E-4 | 0.00E+0 | 1.07E-5 |         |
|                 |                 | <i>mix</i>   | 1.83E-1      | 1.31E-1 | 1.19E-4 | 1.01E-4 | 1.18E-4 | 1.68E-5 | 2.00E-2 | 5.55E-7 | 5.72E-6 | 1.38E-2 | 1.86E-2 | 7.55E-3 | 1.33E-6 | 5.00E-3 | 0.00E+0 | 1.14E-4 |         |
| 10 <sup>7</sup> |                 | <i>trans</i> | 5.38E-1      | 3.86E-1 | 7.94E-4 | 6.24E-4 | 3.80E-6 | 1.59E-4 | 5.77E-3 | 1.00E-7 | 3.66E-5 | 8.20E-3 | 2.59E-3 | 1.09E-3 | 0.00E+0 | 1.50E-3 | 0.00E+0 | 1.44E-5 |         |
|                 |                 | <i>cis</i>   | 1.92E-2      | 1.38E-2 | 9.61E-4 | 7.04E-4 | 1.50E-6 | 4.11E-4 | 2.60E-4 | 1.00E-7 | 3.03E-5 | 1.24E-1 | 4.06E-2 | 1.65E-2 | 9.00E-7 | 1.02E-4 | 0.00E+0 | 1.10E-6 |         |
|                 |                 | <i>mix</i>   | 3.14E-1      | 2.26E-1 | 8.66E-4 | 6.58E-4 | 2.81E-6 | 2.67E-4 | 3.40E-3 | 1.00E-7 | 3.39E-5 | 5.82E-2 | 1.90E-2 | 7.72E-3 | 3.88E-7 | 8.96E-4 | 0.00E+0 | 8.67E-6 |         |

| T<br>(K)        | P<br>(Pa)       | iso          | Z-i15        | i16     | i24     | i25     | i26     | i27     | i28     | i29     | i31     | E-i32   | Z-i32   | i33     | i34     | i35     | i36     | i37     |         |         |
|-----------------|-----------------|--------------|--------------|---------|---------|---------|---------|---------|---------|---------|---------|---------|---------|---------|---------|---------|---------|---------|---------|---------|
| 550             | 533             | <i>trans</i> | 4.04E-5      | 0.00E+0 | 0.00E+0 | 0.00E+0 | 0.00E+0 | 0.00E+0 | 1.00E-7 | 0.00E+0 |         |         |
|                 |                 | <i>cis</i>   | 3.00E-7      | 0.00E+0 |         |
|                 |                 | <i>mix</i>   | 2.38E-5      | 0.00E+0 | 0.00E+0 | 0.00E+0 | 0.00E+0 | 0.00E+0 | 0.00E+0 | 5.86E-8 | 0.00E+0 |         |
|                 | 10 <sup>4</sup> | <i>trans</i> | 1.51E-4      | 0.00E+0 | 0.00E+0 | 0.00E+0 | 8.20E-6 | 0.00E+0 | 3.60E-5 | 0.00E+0 | 6.00E-7 | 0.00E+0 |         |
|                 |                 | <i>cis</i>   | 2.60E-6      | 0.00E+0 | 0.00E+0 | 1.00E-7 | 5.90E-6 | 0.00E+0 | 1.80E-5 | 0.00E+0 |         |
|                 |                 | <i>mix</i>   | 8.96E-5      | 0.00E+0 | 0.00E+0 | 4.14E-8 | 7.25E-6 | 0.00E+0 | 2.86E-5 | 0.00E+0 | 3.52E-7 | 0.00E+0 |         |
|                 | 10 <sup>5</sup> | <i>trans</i> | 1.14E-4      | 0.00E+0 | 0.00E+0 | 1.60E-6 | 1.10E-4 | 7.00E-7 | 2.78E-3 | 0.00E+0 | 9.80E-6 | 0.00E+0 |         |
|                 |                 | <i>cis</i>   | 2.10E-6      | 0.00E+0 | 0.00E+0 | 3.00E-7 | 2.89E-4 | 0.00E+0 | 2.75E-3 | 0.00E+0 | 1.00E-7 | 0.00E+0 |         |
|                 |                 | <i>mix</i>   | 6.76E-5      | 0.00E+0 | 0.00E+0 | 1.06E-6 | 1.84E-4 | 4.10E-7 | 2.77E-3 | 0.00E+0 | 5.79E-6 | 0.00E+0 |         |
|                 | 10 <sup>6</sup> | <i>trans</i> | 7.60E-6      | 0.00E+0 | 0.00E+0 | 3.30E-6 | 5.55E-5 | 1.40E-6 | 7.25E-3 | 0.00E+0 | 1.53E-5 | 0.00E+0 |         |
|                 |                 | <i>cis</i>   | 2.00E-7      | 0.00E+0 | 0.00E+0 | 2.37E-5 | 1.02E-3 | 2.00E-5 | 1.19E-1 | 0.00E+0 | 1.00E-7 | 0.00E+0 | 1.00E-7 |         |
|                 |                 | <i>mix</i>   | 4.54E-6      | 0.00E+0 | 0.00E+0 | 1.17E-5 | 4.55E-4 | 9.10E-6 | 5.36E-2 | 0.00E+0 | 9.01E-6 | 0.00E+0 | 4.14E-8 |         |
|                 | 10 <sup>7</sup> | <i>trans</i> | 2.00E-7      | 0.00E+0 | 0.00E+0 | 1.35E-4 | 3.90E-6 | 3.95E-5 | 1.20E-3 | 0.00E+0 | 2.72E-5 | 0.00E+0 |         |
|                 |                 | <i>cis</i>   | 0.00E+0      | 0.00E+0 | 0.00E+0 | 1.86E-2 | 6.02E-4 | 6.74E-3 | 2.12E-1 | 1.10E-6 | 8.00E-7 | 0.00E+0 |         |
|                 |                 | <i>mix</i>   | 1.17E-7      | 0.00E+0 | 0.00E+0 | 7.76E-3 | 2.51E-4 | 2.81E-3 | 8.85E-2 | 4.55E-7 | 1.63E-5 | 0.00E+0 |         |
|                 | 800             | 533          | <i>trans</i> | 5.80E-6 | 0.00E+0 |         |
|                 |                 |              | <i>cis</i>   | 1.00E-7 | 0.00E+0 |
|                 |                 |              | <i>mix</i>   | 3.34E-6 | 0.00E+0 |
| 10 <sup>4</sup> |                 | <i>trans</i> | 1.03E-4      | 2.00E-7 | 0.00E+0 | 0.00E+0 | 2.00E-7 | 1.00E-7 | 8.00E-7 | 0.00E+0 |         |
|                 |                 | <i>cis</i>   | 3.40E-6      | 0.00E+0 | 0.00E+0 | 1.00E-7 | 1.00E-7 | 0.00E+0 |         |
|                 |                 | <i>mix</i>   | 6.00E-5      | 1.14E-7 | 0.00E+0 | 4.31E-8 | 1.57E-7 | 5.69E-8 | 4.55E-7 | 0.00E+0 |         |
| 10 <sup>5</sup> |                 | <i>trans</i> | 3.15E-4      | 0.00E+0 | 0.00E+0 | 5.90E-6 | 4.11E-5 | 5.00E-7 | 2.98E-4 | 0.00E+0 | 6.10E-6 | 0.00E+0 |         |
|                 |                 | <i>cis</i>   | 1.35E-5      | 0.00E+0 | 0.00E+0 | 6.00E-7 | 3.55E-5 | 2.00E-7 | 1.24E-4 | 0.00E+0 |         |
|                 |                 | <i>mix</i>   | 1.85E-4      | 0.00E+0 | 0.00E+0 | 3.62E-6 | 3.87E-5 | 3.71E-7 | 2.23E-4 | 0.00E+0 | 3.47E-6 | 0.00E+0 |         |
| 10 <sup>6</sup> |                 | <i>trans</i> | 2.62E-4      | 1.00E-7 | 0.00E+0 | 9.54E-5 | 2.73E-4 | 1.16E-5 | 9.94E-3 | 0.00E+0 | 8.97E-5 | 1.00E-7 | 1.00E-7 | 0.00E+0 | 0.00E+0 | 0.00E+0 | 0.00E+0 | 2.00E-7 | 0.00E+0 |         |
|                 |                 | <i>cis</i>   | 1.49E-5      | 0.00E+0 | 0.00E+0 | 2.18E-5 | 6.68E-4 | 5.00E-6 | 1.43E-2 | 0.00E+0 | 2.70E-6 | 0.00E+0 | 1.00E-7 | 0.00E+0 | 0.00E+0 | 0.00E+0 | 0.00E+0 | 0.00E+0 | 1.00E-7 |         |
|                 |                 | <i>mix</i>   | 1.56E-4      | 5.69E-8 | 0.00E+0 | 6.37E-5 | 4.43E-4 | 8.76E-6 | 1.18E-2 | 0.00E+0 | 5.22E-5 | 5.69E-8 | 1.00E-7 | 0.00E+0 | 0.00E+0 | 0.00E+0 | 0.00E+0 | 1.14E-7 | 4.31E-8 |         |
| 10 <sup>7</sup> |                 | <i>trans</i> | 2.18E-5      | 0.00E+0 | 0.00E+0 | 3.26E-4 | 1.10E-4 | 3.94E-5 | 1.12E-2 | 1.00E-7 | 1.74E-4 | 2.00E-7 | 2.00E-7 | 0.00E+0 | 0.00E+0 | 0.00E+0 | 0.00E+0 | 0.00E+0 | 0.00E+0 |         |
|                 |                 | <i>cis</i>   | 1.10E-6      | 0.00E+0 | 0.00E+0 | 1.13E-3 | 1.78E-3 | 2.56E-4 | 1.71E-1 | 0.00E+0 | 7.10E-6 | 0.00E+0 | 0.00E+0 | 0.00E+0 | 0.00E+0 | 0.00E+0 | 0.00E+0 | 1.00E-7 | 7.00E-7 |         |
|                 |                 | <i>mix</i>   | 1.29E-5      | 0.00E+0 | 0.00E+0 | 6.73E-4 | 8.28E-4 | 1.33E-4 | 7.99E-2 | 5.69E-8 | 1.02E-4 | 1.14E-7 | 1.14E-7 | 0.00E+0 | 0.00E+0 | 0.00E+0 | 0.00E+0 | 4.31E-8 | 3.02E-7 |         |

| T (K)           | P (Pa)          | iso          | i38          | i39     | i40     | i41     | i42     | i45     | E-βS    | Z-βS    | p1      | p2      | p3      | p4      | p5      | p6      | p8      | p10     |         |
|-----------------|-----------------|--------------|--------------|---------|---------|---------|---------|---------|---------|---------|---------|---------|---------|---------|---------|---------|---------|---------|---------|
| 550             | 533             | <i>trans</i> | 2.50E-6      | 1.60E-5 | 0.00E+0 | 0.00E+0 | 4.70E-6 | 2.42E-3 | 6.90E-6 | 3.52E-4 | 3.22E-4 | 9.09E-1 | 1.11E-2 | 8.66E-3 | 0.00E+0 | 5.00E-5 | 2.85E-2 | 0.00E+0 |         |
|                 |                 | <i>cis</i>   | 1.00E-7      | 2.70E-6 | 0.00E+0 | 0.00E+0 | 9.00E-7 | 2.51E-3 | 7.50E-6 | 1.17E-5 | 1.08E-5 | 9.68E-1 | 2.69E-4 | 2.12E-4 | 0.00E+0 | 5.68E-5 | 2.84E-2 | 0.00E+0 |         |
|                 |                 | <i>mix</i>   | 1.51E-6      | 1.05E-5 | 0.00E+0 | 0.00E+0 | 3.13E-6 | 2.46E-3 | 7.15E-6 | 2.11E-4 | 1.93E-4 | 9.34E-1 | 6.61E-3 | 5.16E-3 | 0.00E+0 | 5.28E-5 | 2.85E-2 | 0.00E+0 |         |
|                 | 10 <sup>4</sup> | <i>trans</i> | 6.00E-7      | 1.88E-3 | 1.00E-7 | 0.00E+0 | 7.00E-4 | 8.44E-3 | 6.80E-6 | 3.16E-4 | 2.33E-5 | 8.25E-1 | 9.35E-3 | 9.36E-4 | 0.00E+0 | 3.94E-5 | 1.54E-2 | 0.00E+0 |         |
|                 |                 | <i>cis</i>   | 0.00E+0      | 2.01E-3 | 1.00E-7 | 0.00E+0 | 7.14E-4 | 1.05E-2 | 8.10E-6 | 1.07E-5 | 8.00E-7 | 9.64E-1 | 2.47E-4 | 3.17E-5 | 1.00E-7 | 5.32E-5 | 1.94E-2 | 0.00E+0 |         |
|                 |                 | <i>mix</i>   | 3.52E-7      | 1.93E-3 | 1.00E-7 | 0.00E+0 | 7.05E-4 | 9.29E-3 | 7.34E-6 | 1.89E-4 | 1.40E-5 | 8.83E-1 | 5.58E-3 | 5.62E-4 | 4.14E-8 | 4.51E-5 | 1.71E-2 | 0.00E+0 |         |
|                 | 10 <sup>5</sup> | <i>trans</i> | 1.00E-7      | 1.59E-3 | 0.00E+0 | 5.00E-7 | 1.43E-3 | 3.71E-3 | 3.40E-6 | 1.62E-4 | 1.50E-6 | 3.41E-1 | 4.17E-3 | 5.40E-5 | 0.00E+0 | 1.82E-5 | 2.77E-3 | 0.00E+0 |         |
|                 |                 | <i>cis</i>   | 0.00E+0      | 4.76E-3 | 1.00E-7 | 1.00E-6 | 3.95E-3 | 1.09E-2 | 7.70E-6 | 4.60E-6 | 0.00E+0 | 9.32E-1 | 1.15E-4 | 2.00E-6 | 0.00E+0 | 5.11E-5 | 8.29E-3 | 1.00E-7 |         |
|                 |                 | <i>mix</i>   | 5.86E-8      | 2.90E-3 | 4.14E-8 | 7.07E-7 | 2.48E-3 | 6.70E-3 | 5.18E-6 | 9.66E-5 | 8.79E-7 | 5.85E-1 | 2.49E-3 | 3.25E-5 | 0.00E+0 | 3.18E-5 | 5.05E-3 | 4.14E-8 |         |
|                 | 10 <sup>6</sup> | <i>trans</i> | 0.00E+0      | 5.38E-5 | 1.00E-7 | 6.80E-6 | 3.68E-4 | 4.18E-4 | 1.00E-6 | 2.95E-5 | 0.00E+0 | 3.90E-2 | 6.86E-4 | 4.00E-7 | 0.00E+0 | 1.90E-6 | 1.01E-4 | 1.00E-7 |         |
|                 |                 | <i>cis</i>   | 0.00E+0      | 9.49E-4 | 3.00E-7 | 1.20E-4 | 7.13E-3 | 7.86E-3 | 7.90E-6 | 1.30E-6 | 0.00E+0 | 7.10E-1 | 1.70E-5 | 0.00E+0 | 0.00E+0 | 3.29E-5 | 1.86E-3 | 0.00E+0 |         |
|                 |                 | <i>mix</i>   | 0.00E+0      | 4.24E-4 | 1.83E-7 | 5.38E-5 | 3.17E-3 | 3.50E-3 | 3.86E-6 | 1.78E-5 | 0.00E+0 | 3.17E-1 | 4.09E-4 | 2.34E-7 | 0.00E+0 | 1.47E-5 | 8.28E-4 | 5.86E-8 |         |
|                 | 10 <sup>7</sup> | <i>trans</i> | 0.00E+0      | 2.00E-7 | 0.00E+0 | 3.00E-7 | 1.58E-5 | 1.34E-5 | 0.00E+0 | 2.70E-6 | 0.00E+0 | 2.62E-3 | 7.02E-5 | 0.00E+0 | 0.00E+0 | 2.00E-7 | 1.10E-6 | 0.00E+0 |         |
|                 |                 | <i>cis</i>   | 0.00E+0      | 2.16E-5 | 0.00E+0 | 8.67E-5 | 2.67E-3 | 2.51E-3 | 4.50E-6 | 1.00E-7 | 0.00E+0 | 4.64E-1 | 8.00E-7 | 0.00E+0 | 0.00E+0 | 1.52E-5 | 2.38E-4 | 0.00E+0 |         |
|                 |                 | <i>mix</i>   | 0.00E+0      | 9.06E-6 | 0.00E+0 | 3.61E-5 | 1.11E-3 | 1.05E-3 | 1.86E-6 | 1.62E-6 | 0.00E+0 | 1.94E-1 | 4.15E-5 | 0.00E+0 | 0.00E+0 | 6.41E-6 | 9.90E-5 | 0.00E+0 |         |
|                 | 800             | 533          | <i>trans</i> | 3.40E-6 | 1.10E-6 | 0.00E+0 | 0.00E+0 | 0.00E+0 | 1.07E-4 | 3.62E-4 | 7.82E-3 | 3.91E-3 | 8.18E-1 | 5.96E-2 | 5.01E-2 | 2.20E-6 | 1.03E-3 | 5.40E-2 | 6.00E-7 |
|                 |                 |              | <i>cis</i>   | 2.00E-7 | 0.00E+0 | 0.00E+0 | 0.00E+0 | 0.00E+0 | 1.02E-4 | 5.35E-4 | 5.82E-4 | 2.27E-4 | 9.34E-1 | 4.03E-3 | 2.58E-3 | 2.30E-6 | 1.35E-3 | 5.66E-2 | 1.50E-6 |
|                 |                 |              | <i>mix</i>   | 2.02E-6 | 6.26E-7 | 0.00E+0 | 0.00E+0 | 0.00E+0 | 1.05E-4 | 4.36E-4 | 4.70E-3 | 2.32E-3 | 8.68E-1 | 3.57E-2 | 2.96E-2 | 2.24E-6 | 1.17E-3 | 5.51E-2 | 9.88E-7 |
| 10 <sup>4</sup> |                 | <i>trans</i> | 1.01E-5      | 1.88E-4 | 0.00E+0 | 0.00E+0 | 6.32E-5 | 5.80E-3 | 3.40E-4 | 7.65E-3 | 2.14E-3 | 8.10E-1 | 5.84E-2 | 2.87E-2 | 1.70E-6 | 9.93E-4 | 4.55E-2 | 1.50E-6 |         |
|                 |                 | <i>cis</i>   | 3.00E-7      | 1.02E-4 | 0.00E+0 | 0.00E+0 | 3.12E-5 | 6.30E-3 | 5.17E-4 | 5.65E-4 | 1.58E-4 | 9.33E-1 | 3.94E-3 | 1.75E-3 | 1.70E-6 | 1.36E-3 | 5.09E-2 | 1.00E-6 |         |
|                 |                 | <i>mix</i>   | 5.88E-6      | 1.51E-4 | 0.00E+0 | 0.00E+0 | 4.94E-5 | 6.01E-3 | 4.16E-4 | 4.60E-3 | 1.29E-3 | 8.63E-1 | 3.49E-2 | 1.71E-2 | 1.70E-6 | 1.15E-3 | 4.78E-2 | 1.28E-6 |         |
| 10 <sup>5</sup> |                 | <i>trans</i> | 4.90E-6      | 3.07E-3 | 3.00E-7 | 0.00E+0 | 1.32E-3 | 1.33E-2 | 3.17E-4 | 6.80E-3 | 5.01E-4 | 7.50E-1 | 5.12E-2 | 7.36E-3 | 8.00E-7 | 8.53E-4 | 2.68E-2 | 9.00E-7 |         |
|                 |                 | <i>cis</i>   | 1.20E-6      | 3.37E-3 | 2.00E-7 | 0.00E+0 | 1.37E-3 | 1.74E-2 | 5.14E-4 | 5.10E-4 | 4.25E-5 | 9.27E-1 | 3.56E-3 | 5.68E-4 | 1.90E-6 | 1.28E-3 | 3.58E-2 | 1.50E-6 |         |
|                 |                 | <i>mix</i>   | 3.31E-6      | 3.20E-3 | 2.57E-7 | 0.00E+0 | 1.34E-3 | 1.51E-2 | 4.02E-4 | 4.09E-3 | 3.04E-4 | 8.26E-1 | 3.07E-2 | 4.43E-3 | 1.27E-6 | 1.04E-3 | 3.07E-2 | 1.16E-6 |         |
| 10 <sup>6</sup> |                 | <i>trans</i> | 6.00E-7      | 2.22E-3 | 6.00E-7 | 9.80E-6 | 3.01E-3 | 6.55E-3 | 1.73E-4 | 3.58E-3 | 3.27E-5 | 3.35E-1 | 2.52E-2 | 5.74E-4 | 5.00E-7 | 3.75E-4 | 5.07E-3 | 4.00E-7 |         |
|                 |                 | <i>cis</i>   | 0.00E+0      | 6.21E-3 | 2.60E-6 | 1.60E-5 | 7.87E-3 | 1.79E-2 | 4.78E-4 | 2.69E-4 | 3.00E-6 | 8.56E-1 | 1.79E-3 | 4.53E-5 | 9.00E-7 | 1.05E-3 | 1.40E-2 | 1.30E-6 |         |
|                 |                 | <i>mix</i>   | 3.42E-7      | 3.94E-3 | 1.46E-6 | 1.25E-5 | 5.10E-3 | 1.14E-2 | 3.04E-4 | 2.15E-3 | 1.99E-5 | 5.60E-1 | 1.51E-2 | 3.46E-4 | 6.72E-7 | 6.67E-4 | 8.93E-3 | 7.88E-7 |         |
| 10 <sup>7</sup> |                 | <i>trans</i> | 0.00E+0      | 5.62E-5 | 1.00E-7 | 2.33E-5 | 5.75E-4 | 6.26E-4 | 2.40E-5 | 6.74E-4 | 2.00E-7 | 3.73E-2 | 4.44E-3 | 1.29E-5 | 0.00E+0 | 5.15E-5 | 1.82E-4 | 0.00E+0 |         |
|                 |                 | <i>cis</i>   | 0.00E+0      | 7.96E-4 | 1.50E-6 | 4.20E-4 | 9.70E-3 | 1.04E-2 | 3.43E-4 | 4.05E-5 | 0.00E+0 | 5.84E-1 | 2.57E-4 | 8.00E-7 | 0.00E+0 | 7.13E-4 | 2.84E-3 | 3.00E-7 |         |
|                 |                 | <i>mix</i>   | 0.00E+0      | 3.75E-4 | 7.03E-7 | 1.94E-4 | 4.51E-3 | 4.84E-3 | 1.61E-4 | 4.01E-4 | 1.14E-7 | 2.73E-1 | 2.64E-3 | 7.69E-6 | 0.00E+0 | 3.36E-4 | 1.33E-3 | 1.29E-7 |         |



| T<br>(K)        | P<br>(Pa)       | iso          | E-i1         | Z-i1    | E-i2    | Z-i2    | i4      | i5      | i6      | i7      | i8      | i9      | i10     | i11     | i12     | i13     | i14     | E-i15   |         |         |
|-----------------|-----------------|--------------|--------------|---------|---------|---------|---------|---------|---------|---------|---------|---------|---------|---------|---------|---------|---------|---------|---------|---------|
| 1000            | 533             | <i>trans</i> | 0.00E+0      | 0.00E+0 | 0.00E+0 | 0.00E+0 | 1.43E-4 | 0.00E+0 | 9.94E-5 | 3.00E-7 | 0.00E+0 | 0.00E+0 | 0.00E+0 | 0.00E+0 | 2.00E-7 | 2.10E-6 | 0.00E+0 | 0.00E+0 |         |         |
|                 |                 | <i>cis</i>   | 0.00E+0      | 0.00E+0 | 0.00E+0 | 0.00E+0 | 3.00E-6 | 0.00E+0 | 2.40E-6 | 0.00E+0 |         |
|                 |                 | <i>mix</i>   | 0.00E+0      | 0.00E+0 | 0.00E+0 | 0.00E+0 | 8.12E-5 | 0.00E+0 | 5.68E-5 | 1.68E-7 | 0.00E+0 | 0.00E+0 | 0.00E+0 | 0.00E+0 | 0.00E+0 | 1.12E-7 | 1.18E-6 | 0.00E+0 | 0.00E+0 |         |
|                 | 10 <sup>4</sup> | <i>trans</i> | 6.20E-6      | 5.50E-6 | 0.00E+0 | 0.00E+0 | 2.17E-3 | 0.00E+0 | 5.10E-3 | 6.80E-6 | 0.00E+0 | 1.00E-7 | 6.00E-7 | 2.00E-7 | 5.80E-6 | 3.24E-4 | 0.00E+0 | 2.08E-5 |         |         |
|                 |                 | <i>cis</i>   | 4.00E-7      | 1.00E-7 | 0.00E+0 | 0.00E+0 | 1.06E-4 | 0.00E+0 | 2.01E-4 | 2.00E-7 | 0.00E+0 | 1.00E-7 | 1.00E-7 | 1.00E-7 | 7.00E-7 | 1.12E-5 | 0.00E+0 | 1.50E-6 |         |         |
|                 |                 | <i>mix</i>   | 3.65E-6      | 3.13E-6 | 0.00E+0 | 0.00E+0 | 1.26E-3 | 0.00E+0 | 2.94E-3 | 3.90E-6 | 0.00E+0 | 1.00E-7 | 3.80E-7 | 1.56E-7 | 3.56E-6 | 1.87E-4 | 0.00E+0 | 1.23E-5 |         |         |
|                 | 10 <sup>5</sup> | <i>trans</i> | 1.39E-3      | 1.04E-3 | 1.80E-6 | 9.00E-7 | 4.55E-3 | 1.00E-7 | 3.35E-2 | 2.27E-5 | 1.00E-7 | 1.10E-5 | 2.49E-4 | 1.02E-4 | 7.60E-6 | 4.96E-3 | 0.00E+0 | 1.83E-4 |         |         |
|                 |                 | <i>cis</i>   | 4.23E-5      | 3.13E-5 | 1.00E-7 | 0.00E+0 | 3.41E-4 | 0.00E+0 | 2.07E-3 | 2.00E-6 | 0.00E+0 | 2.70E-6 | 1.55E-4 | 6.75E-5 | 5.90E-6 | 3.01E-4 | 0.00E+0 | 1.18E-5 |         |         |
|                 |                 | <i>mix</i>   | 7.95E-4      | 5.96E-4 | 1.05E-6 | 5.04E-7 | 2.70E-3 | 5.60E-8 | 1.97E-2 | 1.36E-5 | 5.60E-8 | 7.35E-6 | 2.07E-4 | 8.70E-5 | 6.85E-6 | 2.91E-3 | 0.00E+0 | 1.08E-4 |         |         |
|                 | 10 <sup>6</sup> | <i>trans</i> | 7.75E-2      | 5.81E-2 | 1.80E-4 | 1.50E-4 | 1.90E-3 | 2.38E-5 | 6.26E-2 | 1.64E-5 | 1.19E-5 | 3.11E-3 | 1.01E-2 | 4.48E-3 | 4.60E-6 | 1.50E-2 | 0.00E+0 | 4.65E-4 |         |         |
|                 |                 | <i>cis</i>   | 4.24E-3      | 3.18E-3 | 1.07E-5 | 9.60E-6 | 2.33E-4 | 1.20E-6 | 5.13E-3 | 2.80E-6 | 1.20E-6 | 1.78E-3 | 1.25E-2 | 5.37E-3 | 7.50E-6 | 1.32E-3 | 0.00E+0 | 4.53E-5 |         |         |
|                 |                 | <i>mix</i>   | 4.53E-2      | 3.40E-2 | 1.05E-4 | 8.81E-5 | 1.17E-3 | 1.39E-5 | 3.74E-2 | 1.04E-5 | 7.20E-6 | 2.53E-3 | 1.11E-2 | 4.87E-3 | 5.87E-6 | 8.99E-3 | 0.00E+0 | 2.81E-4 |         |         |
|                 | 10 <sup>7</sup> | <i>trans</i> | 3.95E-1      | 3.00E-1 | 1.75E-3 | 1.48E-3 | 1.16E-4 | 2.19E-4 | 2.62E-2 | 1.10E-6 | 1.29E-4 | 1.72E-2 | 1.05E-2 | 4.80E-3 | 1.10E-6 | 7.19E-3 | 0.00E+0 | 1.78E-4 |         |         |
|                 |                 | <i>cis</i>   | 2.80E-2      | 2.14E-2 | 1.47E-4 | 1.29E-4 | 3.00E-5 | 2.04E-5 | 2.28E-3 | 1.40E-6 | 1.24E-5 | 6.60E-2 | 4.36E-2 | 1.94E-2 | 8.80E-6 | 7.81E-4 | 0.00E+0 | 1.86E-5 |         |         |
|                 |                 | <i>mix</i>   | 2.33E-1      | 1.78E-1 | 1.05E-3 | 8.83E-4 | 7.79E-5 | 1.32E-4 | 1.57E-2 | 1.23E-6 | 7.77E-5 | 3.86E-2 | 2.50E-2 | 1.12E-2 | 4.48E-6 | 4.37E-3 | 0.00E+0 | 1.08E-4 |         |         |
|                 | 1200            | 533          | <i>trans</i> | 1.00E-7 | 0.00E+0 | 0.00E+0 | 0.00E+0 | 3.20E-6 | 0.00E+0 | 1.90E-6 | 0.00E+0 |         |
|                 |                 |              | <i>cis</i>   | 0.00E+0 |
|                 |                 |              | <i>mix</i>   | 5.55E-8 | 0.00E+0 | 0.00E+0 | 0.00E+0 | 1.77E-6 | 0.00E+0 | 1.05E-6 | 0.00E+0 |         |
| 10 <sup>4</sup> |                 | <i>trans</i> | 3.00E-7      | 5.00E-7 | 0.00E+0 | 0.00E+0 | 1.84E-4 | 0.00E+0 | 3.09E-4 | 1.30E-6 | 0.00E+0 | 0.00E+0 | 0.00E+0 | 0.00E+0 | 4.00E-7 | 9.80E-6 | 0.00E+0 | 1.30E-6 |         |         |
|                 |                 | <i>cis</i>   | 0.00E+0      | 0.00E+0 | 0.00E+0 | 0.00E+0 | 9.00E-6 | 0.00E+0 | 1.51E-5 | 1.00E-7 | 0.00E+0 | 0.00E+0 | 0.00E+0 | 0.00E+0 | 0.00E+0 | 6.00E-7 | 0.00E+0 | 0.00E+0 |         |         |
|                 |                 | <i>mix</i>   | 1.66E-7      | 2.77E-7 | 0.00E+0 | 0.00E+0 | 1.06E-4 | 0.00E+0 | 1.78E-4 | 7.65E-7 | 0.00E+0 | 0.00E+0 | 0.00E+0 | 0.00E+0 | 2.22E-7 | 5.70E-6 | 0.00E+0 | 7.21E-7 |         |         |
| 10 <sup>5</sup> |                 | <i>trans</i> | 4.85E-5      | 3.62E-5 | 1.00E-7 | 0.00E+0 | 1.54E-3 | 0.00E+0 | 6.48E-3 | 1.25E-5 | 0.00E+0 | 5.00E-7 | 9.70E-6 | 2.70E-6 | 5.80E-6 | 6.12E-4 | 0.00E+0 | 4.95E-5 |         |         |
|                 |                 | <i>cis</i>   | 2.50E-6      | 2.60E-6 | 0.00E+0 | 0.00E+0 | 1.31E-4 | 0.00E+0 | 4.77E-4 | 8.00E-7 | 0.00E+0 | 2.00E-7 | 5.60E-6 | 2.20E-6 | 1.90E-6 | 4.13E-5 | 0.00E+0 | 2.80E-6 |         |         |
|                 |                 | <i>mix</i>   | 2.80E-5      | 2.12E-5 | 5.55E-8 | 0.00E+0 | 9.14E-4 | 0.00E+0 | 3.81E-3 | 7.29E-6 | 0.00E+0 | 3.66E-7 | 7.87E-6 | 2.48E-6 | 4.06E-6 | 3.58E-4 | 0.00E+0 | 2.87E-5 |         |         |
| 10 <sup>6</sup> |                 | <i>trans</i> | 8.24E-3      | 6.34E-3 | 4.14E-5 | 3.27E-5 | 3.08E-3 | 4.60E-6 | 4.02E-2 | 3.35E-5 | 3.80E-6 | 2.97E-4 | 2.53E-3 | 1.13E-3 | 1.26E-5 | 8.06E-3 | 0.00E+0 | 3.76E-4 |         |         |
|                 |                 | <i>cis</i>   | 5.76E-4      | 4.46E-4 | 2.70E-6 | 1.80E-6 | 4.19E-4 | 4.00E-7 | 4.27E-3 | 5.30E-6 | 9.00E-7 | 1.28E-4 | 2.46E-3 | 1.06E-3 | 1.75E-5 | 9.06E-4 | 0.00E+0 | 3.70E-5 |         |         |
|                 |                 | <i>mix</i>   | 4.83E-3      | 3.71E-3 | 2.42E-5 | 1.89E-5 | 1.90E-3 | 2.73E-6 | 2.42E-2 | 2.09E-5 | 2.51E-6 | 2.22E-4 | 2.50E-3 | 1.10E-3 | 1.48E-5 | 4.88E-3 | 0.00E+0 | 2.25E-4 |         |         |
| 10 <sup>7</sup> |                 | <i>trans</i> | 1.83E-1      | 1.44E-1 | 1.83E-3 | 1.60E-3 | 9.08E-4 | 1.90E-4 | 5.29E-2 | 1.70E-5 | 1.66E-4 | 1.24E-2 | 1.75E-2 | 8.39E-3 | 8.90E-6 | 1.47E-2 | 0.00E+0 | 5.93E-4 |         |         |
|                 |                 | <i>cis</i>   | 1.95E-2      | 1.54E-2 | 2.16E-4 | 1.82E-4 | 2.45E-4 | 2.11E-5 | 6.73E-3 | 6.90E-6 | 2.83E-5 | 1.91E-2 | 3.45E-2 | 1.59E-2 | 2.84E-5 | 2.22E-3 | 0.00E+0 | 8.26E-5 |         |         |
|                 |                 | <i>mix</i>   | 1.10E-1      | 8.68E-2 | 1.11E-3 | 9.69E-4 | 6.13E-4 | 1.15E-4 | 3.23E-2 | 1.25E-5 | 1.05E-4 | 1.54E-2 | 2.51E-2 | 1.17E-2 | 1.76E-5 | 9.15E-3 | 0.00E+0 | 3.66E-4 |         |         |

| T<br>(K)        | P<br>(Pa)       | iso          | Z-i15        | i16     | i24     | i25     | i26     | i27     | i28     | i29     | i31     | E-i32   | Z-i32   | i33     | i34     | i35     | i36     | i37     |         |         |         |
|-----------------|-----------------|--------------|--------------|---------|---------|---------|---------|---------|---------|---------|---------|---------|---------|---------|---------|---------|---------|---------|---------|---------|---------|
| 1000            | 533             | <i>trans</i> | 2.00E-7      | 0.00E+0 |         |         |
|                 |                 | <i>cis</i>   | 0.00E+0      | 0.00E+0 | 0.00E+0 | 0.00E+0 | 0.00E+0 | 0.00E+0 | 0.00E+0 | 0.00E+0 | 0.00E+0 | 0.00E+0 | 0.00E+0 | 0.00E+0 | 0.00E+0 | 0.00E+0 | 0.00E+0 | 0.00E+0 | 0.00E+0 | 0.00E+0 |         |
|                 |                 | <i>mix</i>   | 1.12E-7      | 0.00E+0 |         |
|                 | 10 <sup>4</sup> | <i>trans</i> | 2.62E-5      | 0.00E+0 |         |
|                 |                 | <i>cis</i>   | 1.70E-6      | 1.00E-7 | 0.00E+0 |         |
|                 |                 | <i>mix</i>   | 1.54E-5      | 4.40E-8 | 0.00E+0 |         |
|                 | 10 <sup>5</sup> | <i>trans</i> | 2.46E-4      | 1.00E-7 | 0.00E+0 | 3.00E-7 | 3.70E-6 | 4.00E-7 | 1.59E-5 | 0.00E+0 | 5.00E-7 | 0.00E+0 | 0.00E+0 | 0.00E+0 | 0.00E+0 | 0.00E+0 | 0.00E+0 | 5.00E-7 | 0.00E+0 |         |         |
|                 |                 | <i>cis</i>   | 1.57E-5      | 0.00E+0 | 0.00E+0 | 0.00E+0 | 1.40E-6 | 0.00E+0 | 6.00E-6 | 0.00E+0 |         |         |
|                 |                 | <i>mix</i>   | 1.45E-4      | 5.60E-8 | 0.00E+0 | 1.68E-7 | 2.69E-6 | 2.24E-7 | 1.15E-5 | 0.00E+0 | 2.80E-7 | 0.00E+0 | 0.00E+0 | 0.00E+0 | 0.00E+0 | 0.00E+0 | 0.00E+0 | 2.80E-7 | 0.00E+0 |         |         |
|                 | 10 <sup>6</sup> | <i>trans</i> | 6.41E-4      | 1.50E-6 | 0.00E+0 | 9.46E-5 | 2.17E-4 | 9.60E-6 | 2.64E-3 | 1.00E-7 | 5.07E-5 | 2.00E-7 | 2.00E-7 | 0.00E+0 | 0.00E+0 | 0.00E+0 | 0.00E+0 | 7.00E-7 | 0.00E+0 |         |         |
|                 |                 | <i>cis</i>   | 5.67E-5      | 1.00E-7 | 0.00E+0 | 2.59E-5 | 2.57E-4 | 3.80E-6 | 1.55E-3 | 1.00E-7 | 3.50E-6 | 0.00E+0 | 0.00E+0 | 0.00E+0 | 0.00E+0 | 0.00E+0 | 0.00E+0 | 1.00E-7 | 0.00E+0 |         |         |
|                 |                 | <i>mix</i>   | 3.84E-4      | 8.85E-7 | 0.00E+0 | 6.44E-5 | 2.34E-4 | 7.05E-6 | 2.16E-3 | 1.00E-7 | 3.00E-5 | 1.12E-7 | 1.12E-7 | 0.00E+0 | 0.00E+0 | 0.00E+0 | 0.00E+0 | 4.36E-7 | 0.00E+0 |         |         |
|                 | 10 <sup>7</sup> | <i>trans</i> | 2.46E-4      | 9.00E-7 | 0.00E+0 | 8.41E-4 | 3.86E-4 | 8.37E-5 | 1.93E-2 | 5.00E-7 | 3.66E-4 | 6.00E-7 | 6.00E-7 | 0.00E+0 | 0.00E+0 | 0.00E+0 | 0.00E+0 | 1.10E-6 | 1.00E-7 |         |         |
|                 |                 | <i>cis</i>   | 2.31E-5      | 1.00E-7 | 0.00E+0 | 5.66E-4 | 1.57E-3 | 8.91E-5 | 7.04E-2 | 1.00E-7 | 2.68E-5 | 7.00E-7 | 4.00E-7 | 0.00E+0 | 0.00E+0 | 0.00E+0 | 0.00E+0 | 5.00E-7 | 2.20E-6 |         |         |
|                 |                 | <i>mix</i>   | 1.48E-4      | 5.48E-7 | 0.00E+0 | 7.20E-4 | 9.05E-4 | 8.61E-5 | 4.17E-2 | 3.24E-7 | 2.17E-4 | 6.44E-7 | 5.12E-7 | 0.00E+0 | 0.00E+0 | 0.00E+0 | 0.00E+0 | 8.36E-7 | 1.02E-6 |         |         |
|                 | 1200            | 533          | <i>trans</i> | 1.00E-7 | 0.00E+0 |         |
|                 |                 |              | <i>cis</i>   | 0.00E+0 |
|                 |                 |              | <i>mix</i>   | 5.55E-8 | 0.00E+0 |
| 10 <sup>4</sup> |                 | <i>trans</i> | 2.60E-6      | 0.00E+0 | 0.00E+0 | 0.00E+0 | 0.00E+0 | 0.00E+0 | 0.00E+0 | 1.00E-7 | 0.00E+0 |         |
|                 |                 | <i>cis</i>   | 1.00E-7      | 0.00E+0 |         |
|                 |                 | <i>mix</i>   | 1.49E-6      | 0.00E+0 | 0.00E+0 | 0.00E+0 | 0.00E+0 | 0.00E+0 | 0.00E+0 | 5.55E-8 | 0.00E+0 |         |
| 10 <sup>5</sup> |                 | <i>trans</i> | 6.91E-5      | 2.00E-7 | 0.00E+0 | 1.00E-7 | 3.00E-7 | 0.00E+0 | 1.30E-6 | 0.00E+0 | 2.00E-7 | 0.00E+0 |         |         |
|                 |                 | <i>cis</i>   | 4.90E-6      | 0.00E+0 | 0.00E+0 | 0.00E+0 | 1.00E-7 | 0.00E+0 | 5.00E-7 | 0.00E+0 |         |         |
|                 |                 | <i>mix</i>   | 4.05E-5      | 1.11E-7 | 0.00E+0 | 5.55E-8 | 2.11E-7 | 0.00E+0 | 9.44E-7 | 0.00E+0 | 1.11E-7 | 0.00E+0 |         |         |
| 10 <sup>6</sup> |                 | <i>trans</i> | 5.19E-4      | 3.40E-6 | 0.00E+0 | 2.40E-5 | 5.51E-5 | 2.10E-6 | 2.97E-4 | 0.00E+0 | 9.70E-6 | 0.00E+0 | 1.00E-7 | 0.00E+0 | 0.00E+0 | 0.00E+0 | 0.00E+0 | 2.50E-6 | 0.00E+0 |         |         |
|                 |                 | <i>cis</i>   | 5.41E-5      | 3.00E-7 | 0.00E+0 | 9.10E-6 | 4.71E-5 | 9.00E-7 | 1.71E-4 | 0.00E+0 | 7.00E-7 | 0.00E+0 | 0.00E+0 | 0.00E+0 | 0.00E+0 | 0.00E+0 | 0.00E+0 | 4.00E-7 | 0.00E+0 |         |         |
|                 |                 | <i>mix</i>   | 3.12E-4      | 2.02E-6 | 0.00E+0 | 1.74E-5 | 5.15E-5 | 1.57E-6 | 2.41E-4 | 0.00E+0 | 5.69E-6 | 0.00E+0 | 5.55E-8 | 0.00E+0 | 0.00E+0 | 0.00E+0 | 0.00E+0 | 1.56E-6 | 0.00E+0 |         |         |
| 10 <sup>7</sup> |                 | <i>trans</i> | 8.35E-4      | 7.10E-6 | 0.00E+0 | 1.02E-3 | 5.47E-4 | 8.81E-5 | 1.14E-2 | 7.00E-7 | 3.47E-4 | 1.40E-6 | 1.60E-6 | 0.00E+0 | 0.00E+0 | 0.00E+0 | 0.00E+0 | 7.10E-6 | 4.00E-7 |         |         |
|                 |                 | <i>cis</i>   | 1.07E-4      | 1.60E-6 | 0.00E+0 | 4.59E-4 | 9.97E-4 | 4.65E-5 | 1.60E-2 | 4.00E-7 | 3.59E-5 | 4.00E-7 | 7.00E-7 | 0.00E+0 | 0.00E+0 | 0.00E+0 | 0.00E+0 | 1.00E-6 | 7.00E-7 |         |         |
|                 |                 | <i>mix</i>   | 5.10E-4      | 4.65E-6 | 0.00E+0 | 7.69E-4 | 7.48E-4 | 6.96E-5 | 1.34E-2 | 5.66E-7 | 2.08E-4 | 9.55E-7 | 1.20E-6 | 0.00E+0 | 0.00E+0 | 0.00E+0 | 0.00E+0 | 4.38E-6 | 5.34E-7 |         |         |

| T<br>(K)        | P<br>(Pa)       | iso          | i38          | i39     | i40     | i41     | i42     | i45     | <i>E</i> -βS | Z-βS    | p1      | p2      | p3      | p4      | p5      | p6      | p8      | p10     |         |
|-----------------|-----------------|--------------|--------------|---------|---------|---------|---------|---------|--------------|---------|---------|---------|---------|---------|---------|---------|---------|---------|---------|
| 1000            | 533             | <i>trans</i> | 3.00E-7      | 1.00E-7 | 0.00E+0 | 0.00E+0 | 0.00E+0 | 3.40E-6 | 2.53E-3      | 3.41E-2 | 7.35E-3 | 6.77E-1 | 1.39E-1 | 6.95E-2 | 2.20E-5 | 4.86E-3 | 6.64E-2 | 8.70E-6 |         |
|                 |                 | <i>cis</i>   | 0.00E+0      | 0.00E+0 | 0.00E+0 | 0.00E+0 | 0.00E+0 | 2.20E-6 | 4.43E-3      | 4.07E-3 | 7.15E-4 | 8.79E-1 | 1.66E-2 | 6.10E-3 | 2.79E-5 | 7.68E-3 | 8.18E-2 | 1.67E-5 |         |
|                 |                 | <i>mix</i>   | 1.68E-7      | 5.60E-8 | 0.00E+0 | 0.00E+0 | 0.00E+0 | 2.87E-6 | 3.36E-3      | 2.09E-2 | 4.43E-3 | 7.65E-1 | 8.49E-2 | 4.16E-2 | 2.46E-5 | 6.10E-3 | 7.31E-2 | 1.22E-5 |         |
|                 | 10 <sup>4</sup> | <i>trans</i> | 1.16E-5      | 1.47E-5 | 0.00E+0 | 0.00E+0 | 5.30E-6 | 1.15E-3 | 2.54E-3      | 3.41E-2 | 6.72E-3 | 6.76E-1 | 1.38E-1 | 6.40E-2 | 1.87E-5 | 4.85E-3 | 6.48E-2 | 7.60E-6 |         |
|                 |                 | <i>cis</i>   | 1.20E-6      | 2.90E-6 | 0.00E+0 | 0.00E+0 | 6.00E-7 | 1.21E-3 | 4.45E-3      | 4.07E-3 | 6.86E-4 | 8.79E-1 | 1.65E-2 | 5.85E-3 | 2.66E-5 | 7.64E-3 | 8.08E-2 | 1.29E-5 |         |
|                 |                 | <i>mix</i>   | 7.03E-6      | 9.51E-6 | 0.00E+0 | 0.00E+0 | 3.23E-6 | 1.18E-3 | 3.38E-3      | 2.09E-2 | 4.07E-3 | 7.65E-1 | 8.46E-2 | 3.84E-2 | 2.22E-5 | 6.08E-3 | 7.18E-2 | 9.93E-6 |         |
|                 | 10 <sup>5</sup> | <i>trans</i> | 1.90E-5      | 7.94E-4 | 1.00E-7 | 1.00E-7 | 2.99E-4 | 1.02E-2 | 2.45E-3      | 3.31E-2 | 4.10E-3 | 6.71E-1 | 1.34E-1 | 4.04E-2 | 1.73E-5 | 4.66E-3 | 5.24E-2 | 7.20E-6 |         |
|                 |                 | <i>cis</i>   | 3.50E-6      | 5.98E-4 | 2.00E-7 | 0.00E+0 | 2.15E-4 | 1.27E-2 | 4.43E-3      | 3.91E-3 | 4.80E-4 | 8.77E-1 | 1.60E-2 | 4.22E-3 | 2.35E-5 | 7.59E-3 | 6.94E-2 | 1.58E-5 |         |
|                 |                 | <i>mix</i>   | 1.22E-5      | 7.08E-4 | 1.44E-7 | 5.60E-8 | 2.62E-4 | 1.13E-2 | 3.32E-3      | 2.03E-2 | 2.51E-3 | 7.62E-1 | 8.21E-2 | 2.45E-2 | 2.00E-5 | 5.95E-3 | 5.98E-2 | 1.10E-5 |         |
|                 | 10 <sup>6</sup> | <i>trans</i> | 8.20E-6      | 4.66E-3 | 3.70E-6 | 3.50E-6 | 3.05E-3 | 1.53E-2 | 2.00E-3      | 2.71E-2 | 8.96E-4 | 5.64E-1 | 1.08E-1 | 9.65E-3 | 8.40E-6 | 3.45E-3 | 2.43E-2 | 5.20E-6 |         |
|                 |                 | <i>cis</i>   | 2.10E-6      | 6.89E-3 | 6.20E-6 | 1.80E-6 | 4.04E-3 | 2.52E-2 | 4.30E-3      | 3.22E-3 | 1.24E-4 | 8.58E-1 | 1.28E-2 | 1.18E-3 | 1.60E-5 | 6.81E-3 | 4.16E-2 | 1.22E-5 |         |
|                 |                 | <i>mix</i>   | 5.52E-6      | 5.64E-3 | 4.80E-6 | 2.75E-6 | 3.48E-3 | 1.96E-2 | 3.01E-3      | 1.66E-2 | 5.57E-4 | 6.93E-1 | 6.61E-2 | 5.93E-3 | 1.17E-5 | 4.93E-3 | 3.19E-2 | 8.28E-6 |         |
|                 | 10 <sup>7</sup> | <i>trans</i> | 1.00E-7      | 8.51E-4 | 1.70E-6 | 9.88E-5 | 2.98E-3 | 4.18E-3 | 7.20E-4      | 1.03E-2 | 3.17E-5 | 1.52E-1 | 3.89E-2 | 5.19E-4 | 1.40E-6 | 1.01E-3 | 2.41E-3 | 1.40E-6 |         |
|                 |                 | <i>cis</i>   | 2.00E-7      | 4.17E-3 | 9.40E-6 | 3.68E-4 | 1.39E-2 | 2.00E-2 | 3.59E-3      | 1.12E-3 | 4.20E-6 | 6.82E-1 | 4.16E-3 | 6.35E-5 | 3.40E-6 | 5.00E-3 | 1.16E-2 | 5.90E-6 |         |
|                 |                 | <i>mix</i>   | 1.44E-7      | 2.31E-3 | 5.08E-6 | 2.17E-4 | 7.76E-3 | 1.11E-2 | 1.98E-3      | 6.29E-3 | 1.96E-5 | 3.85E-1 | 2.36E-2 | 3.19E-4 | 2.28E-6 | 2.77E-3 | 6.46E-3 | 3.38E-6 |         |
|                 | 1200            | 533          | <i>trans</i> | 1.00E-7 | 0.00E+0 | 0.00E+0 | 0.00E+0 | 0.00E+0 | 1.00E-7      | 8.93E-3 | 8.86E-2 | 9.73E-3 | 5.02E-1 | 2.34E-1 | 7.52E-2 | 9.44E-5 | 1.34E-2 | 6.82E-2 | 3.89E-5 |
|                 |                 |              | <i>cis</i>   | 0.00E+0 | 0.00E+0 | 0.00E+0 | 0.00E+0 | 0.00E+0 | 0.00E+0      | 2.03E-2 | 1.42E-2 | 1.49E-3 | 7.84E-1 | 4.15E-2 | 9.98E-3 | 1.39E-4 | 2.61E-2 | 1.02E-1 | 8.17E-5 |
|                 |                 |              | <i>mix</i>   | 5.55E-8 | 0.00E+0 | 0.00E+0 | 0.00E+0 | 0.00E+0 | 5.55E-8      | 1.40E-2 | 5.54E-2 | 6.06E-3 | 6.28E-1 | 1.48E-1 | 4.61E-2 | 1.14E-4 | 1.90E-2 | 8.33E-2 | 5.80E-5 |
| 10 <sup>4</sup> |                 | <i>trans</i> | 1.70E-6      | 1.20E-6 | 0.00E+0 | 0.00E+0 | 0.00E+0 | 8.88E-5 | 8.96E-3      | 8.85E-2 | 9.61E-3 | 5.03E-1 | 2.33E-1 | 7.49E-2 | 8.69E-5 | 1.34E-2 | 6.80E-2 | 3.77E-5 |         |
|                 |                 | <i>cis</i>   | 2.00E-7      | 1.00E-7 | 0.00E+0 | 0.00E+0 | 0.00E+0 | 9.73E-5 | 2.03E-2      | 1.42E-2 | 1.47E-3 | 7.84E-1 | 4.15E-2 | 9.96E-3 | 1.38E-4 | 2.60E-2 | 1.02E-1 | 8.44E-5 |         |
|                 |                 | <i>mix</i>   | 1.03E-6      | 7.10E-7 | 0.00E+0 | 0.00E+0 | 0.00E+0 | 9.26E-5 | 1.40E-2      | 5.54E-2 | 5.98E-3 | 6.28E-1 | 1.48E-1 | 4.59E-2 | 1.09E-4 | 1.90E-2 | 8.31E-2 | 5.85E-5 |         |
| 10 <sup>5</sup> |                 | <i>trans</i> | 1.77E-5      | 8.38E-5 | 0.00E+0 | 1.00E-7 | 2.98E-5 | 3.21E-3 | 8.89E-3      | 8.80E-2 | 8.79E-3 | 5.04E-1 | 2.32E-1 | 6.88E-2 | 8.29E-5 | 1.33E-2 | 6.42E-2 | 3.62E-5 |         |
|                 |                 | <i>cis</i>   | 4.80E-6      | 4.14E-5 | 0.00E+0 | 0.00E+0 | 1.38E-5 | 4.06E-3 | 2.03E-2      | 1.40E-2 | 1.37E-3 | 7.85E-1 | 4.11E-2 | 9.46E-3 | 1.25E-4 | 2.59E-2 | 9.80E-2 | 7.98E-5 |         |
|                 |                 | <i>mix</i>   | 1.20E-5      | 6.49E-5 | 0.00E+0 | 5.55E-8 | 2.27E-5 | 3.59E-3 | 1.40E-2      | 5.50E-2 | 5.49E-3 | 6.29E-1 | 1.47E-1 | 4.23E-2 | 1.02E-4 | 1.89E-2 | 7.93E-2 | 5.56E-5 |         |
| 10 <sup>6</sup> |                 | <i>trans</i> | 2.33E-5      | 2.34E-3 | 1.40E-6 | 1.60E-6 | 1.11E-3 | 1.45E-2 | 8.39E-3      | 8.30E-2 | 4.80E-3 | 4.99E-1 | 2.19E-1 | 3.91E-2 | 7.40E-5 | 1.20E-2 | 4.57E-2 | 3.12E-5 |         |
|                 |                 | <i>cis</i>   | 7.70E-6      | 2.63E-3 | 2.20E-6 | 5.00E-7 | 1.14E-3 | 2.26E-2 | 2.01E-2      | 1.33E-2 | 8.38E-4 | 7.84E-1 | 3.82E-2 | 5.92E-3 | 1.14E-4 | 2.49E-2 | 7.56E-2 | 7.83E-5 |         |
|                 |                 | <i>mix</i>   | 1.64E-5      | 2.47E-3 | 1.76E-6 | 1.11E-6 | 1.12E-3 | 1.81E-2 | 1.36E-2      | 5.19E-2 | 3.04E-3 | 6.26E-1 | 1.38E-1 | 2.43E-2 | 9.17E-5 | 1.77E-2 | 5.90E-2 | 5.22E-5 |         |
| 10 <sup>7</sup> |                 | <i>trans</i> | 4.50E-6      | 3.21E-3 | 8.70E-6 | 1.03E-4 | 4.79E-3 | 1.11E-2 | 5.40E-3      | 5.60E-2 | 6.55E-4 | 2.98E-1 | 1.43E-1 | 6.40E-3 | 2.56E-5 | 6.54E-3 | 1.20E-2 | 1.53E-5 |         |
|                 |                 | <i>cis</i>   | 2.90E-6      | 8.31E-3 | 2.65E-5 | 1.34E-4 | 1.08E-2 | 2.87E-2 | 1.83E-2      | 8.50E-3 | 1.35E-4 | 7.17E-1 | 2.31E-2 | 1.03E-3 | 4.99E-5 | 2.04E-2 | 3.20E-2 | 4.33E-5 |         |
|                 |                 | <i>mix</i>   | 3.79E-6      | 5.48E-3 | 1.66E-5 | 1.17E-4 | 7.46E-3 | 1.89E-2 | 1.12E-2      | 3.49E-2 | 4.23E-4 | 4.85E-1 | 8.98E-2 | 4.01E-3 | 3.64E-5 | 1.27E-2 | 2.09E-2 | 2.78E-5 |         |

| T<br>(K)        | P<br>(Pa)       | iso          | E-i1         | Z-i1    | E-i2    | Z-i2    | i4      | i5      | i6      | i7      | i8      | i9      | i10     | i11     | i12     | i13     | i14     | E-i15   |         |         |         |
|-----------------|-----------------|--------------|--------------|---------|---------|---------|---------|---------|---------|---------|---------|---------|---------|---------|---------|---------|---------|---------|---------|---------|---------|
| 1500            | 533             | <i>trans</i> | 0.00E+0      | 0.00E+0 | 0.00E+0 | 0.00E+0 | 0.00E+0 | 0.00E+0 | 0.00E+0 | 0.00E+0 | 0.00E+0 | 0.00E+0 | 0.00E+0 | 0.00E+0 | 0.00E+0 | 0.00E+0 | 0.00E+0 | 0.00E+0 | 0.00E+0 |         |         |
|                 |                 | <i>cis</i>   | 0.00E+0      | 0.00E+0 | 0.00E+0 | 0.00E+0 | 0.00E+0 | 0.00E+0 | 0.00E+0 | 0.00E+0 | 0.00E+0 | 0.00E+0 | 0.00E+0 | 0.00E+0 | 0.00E+0 | 0.00E+0 | 0.00E+0 | 0.00E+0 | 0.00E+0 | 0.00E+0 |         |
|                 |                 | <i>mix</i>   | 0.00E+0      | 0.00E+0 | 0.00E+0 | 0.00E+0 | 0.00E+0 | 0.00E+0 | 0.00E+0 | 0.00E+0 | 0.00E+0 | 0.00E+0 | 0.00E+0 | 0.00E+0 | 0.00E+0 | 0.00E+0 | 0.00E+0 | 0.00E+0 | 0.00E+0 | 0.00E+0 |         |
|                 | 10 <sup>4</sup> | <i>trans</i> | 0.00E+0      | 0.00E+0 | 0.00E+0 | 0.00E+0 | 1.40E-6 | 0.00E+0 | 1.50E-6 | 0.00E+0 |         |
|                 |                 | <i>cis</i>   | 0.00E+0      | 0.00E+0 | 0.00E+0 | 0.00E+0 | 3.00E-7 | 0.00E+0 |         |
|                 |                 | <i>mix</i>   | 0.00E+0      | 0.00E+0 | 0.00E+0 | 0.00E+0 | 9.03E-7 | 0.00E+0 | 8.23E-7 | 0.00E+0 |         |
|                 | 10 <sup>5</sup> | <i>trans</i> | 7.00E-7      | 4.00E-7 | 0.00E+0 | 0.00E+0 | 4.39E-5 | 0.00E+0 | 1.35E-4 | 7.00E-7 | 0.00E+0 | 0.00E+0 | 1.00E-7 | 0.00E+0 | 3.00E-7 | 7.40E-6 | 0.00E+0 | 7.00E-7 | 0.00E+0 | 0.00E+0 |         |
|                 |                 | <i>cis</i>   | 0.00E+0      | 1.00E-7 | 0.00E+0 | 0.00E+0 | 4.40E-6 | 0.00E+0 | 9.50E-6 | 0.00E+0 | 0.00E+0 | 0.00E+0 | 0.00E+0 | 0.00E+0 | 1.00E-7 | 1.10E-6 | 0.00E+0 | 2.00E-7 | 0.00E+0 | 0.00E+0 |         |
|                 |                 | <i>mix</i>   | 3.84E-7      | 2.65E-7 | 0.00E+0 | 0.00E+0 | 2.61E-5 | 0.00E+0 | 7.82E-5 | 3.84E-7 | 0.00E+0 | 0.00E+0 | 5.49E-8 | 0.00E+0 | 2.10E-7 | 4.56E-6 | 0.00E+0 | 4.74E-7 | 0.00E+0 | 0.00E+0 |         |
|                 | 10 <sup>6</sup> | <i>trans</i> | 1.43E-4      | 1.12E-4 | 6.00E-7 | 1.20E-6 | 5.82E-4 | 4.00E-7 | 4.16E-3 | 9.30E-6 | 4.00E-7 | 4.80E-6 | 8.29E-5 | 3.62E-5 | 5.20E-6 | 5.79E-4 | 0.00E+0 | 5.24E-5 | 0.00E+0 | 0.00E+0 |         |
|                 |                 | <i>cis</i>   | 1.38E-5      | 1.16E-5 | 0.00E+0 | 3.00E-7 | 8.48E-5 | 0.00E+0 | 5.41E-4 | 1.40E-6 | 1.00E-7 | 2.10E-6 | 6.77E-5 | 2.71E-5 | 1.06E-5 | 7.91E-5 | 0.00E+0 | 7.60E-6 | 0.00E+0 | 0.00E+0 |         |
|                 |                 | <i>mix</i>   | 8.47E-5      | 6.69E-5 | 3.29E-7 | 7.94E-7 | 3.58E-4 | 2.19E-7 | 2.53E-3 | 5.73E-6 | 2.65E-7 | 3.58E-6 | 7.60E-5 | 3.21E-5 | 7.64E-6 | 3.53E-4 | 0.00E+0 | 3.22E-5 | 0.00E+0 | 0.00E+0 |         |
|                 | 10 <sup>7</sup> | <i>trans</i> | 1.90E-2      | 1.55E-2 | 3.86E-4 | 3.40E-4 | 1.68E-3 | 3.06E-5 | 3.31E-2 | 4.22E-5 | 4.91E-5 | 1.40E-3 | 7.28E-3 | 3.58E-3 | 2.45E-5 | 8.51E-3 | 0.00E+0 | 5.00E-4 | 0.00E+0 | 0.00E+0 |         |
|                 |                 | <i>cis</i>   | 2.83E-3      | 2.34E-3 | 6.53E-5 | 5.84E-5 | 4.64E-4 | 5.90E-6 | 5.57E-3 | 1.28E-5 | 1.43E-5 | 1.11E-3 | 9.49E-3 | 4.63E-3 | 6.00E-5 | 1.70E-3 | 0.00E+0 | 8.20E-5 | 0.00E+0 | 0.00E+0 |         |
|                 |                 | <i>mix</i>   | 1.17E-2      | 9.54E-3 | 2.41E-4 | 2.13E-4 | 1.13E-3 | 1.94E-5 | 2.07E-2 | 2.89E-5 | 3.34E-5 | 1.27E-3 | 8.28E-3 | 4.06E-3 | 4.05E-5 | 5.43E-3 | 0.00E+0 | 3.11E-4 | 0.00E+0 | 0.00E+0 |         |
|                 | 1800            | 533          | <i>trans</i> | 0.00E+0 |         |
|                 |                 |              | <i>cis</i>   | 0.00E+0 |
|                 |                 |              | <i>mix</i>   | 0.00E+0 |
| 10 <sup>4</sup> |                 | <i>trans</i> | 0.00E+0      | 0.00E+0 | 0.00E+0 | 0.00E+0 | 0.00E+0 | 0.00E+0 | 0.00E+0 | 0.00E+0 | 0.00E+0 | 0.00E+0 | 0.00E+0 | 0.00E+0 | 0.00E+0 | 0.00E+0 | 0.00E+0 | 0.00E+0 | 0.00E+0 | 0.00E+0 |         |
|                 |                 | <i>cis</i>   | 0.00E+0      | 0.00E+0 | 0.00E+0 | 0.00E+0 | 0.00E+0 | 0.00E+0 | 0.00E+0 | 0.00E+0 | 0.00E+0 | 0.00E+0 | 0.00E+0 | 0.00E+0 | 0.00E+0 | 0.00E+0 | 0.00E+0 | 0.00E+0 | 0.00E+0 | 0.00E+0 |         |
|                 |                 | <i>mix</i>   | 0.00E+0      | 0.00E+0 | 0.00E+0 | 0.00E+0 | 0.00E+0 | 0.00E+0 | 0.00E+0 | 0.00E+0 | 0.00E+0 | 0.00E+0 | 0.00E+0 | 0.00E+0 | 0.00E+0 | 0.00E+0 | 0.00E+0 | 0.00E+0 | 0.00E+0 | 0.00E+0 |         |
| 10 <sup>5</sup> |                 | <i>trans</i> | 0.00E+0      | 0.00E+0 | 0.00E+0 | 0.00E+0 | 4.00E-7 | 0.00E+0 | 7.00E-7 | 0.00E+0 |         |
|                 |                 | <i>cis</i>   | 0.00E+0      | 0.00E+0 | 0.00E+0 | 0.00E+0 | 0.00E+0 | 0.00E+0 | 0.00E+0 | 0.00E+0 | 0.00E+0 | 0.00E+0 | 0.00E+0 | 0.00E+0 | 0.00E+0 | 0.00E+0 | 0.00E+0 | 0.00E+0 | 0.00E+0 | 0.00E+0 |         |
|                 |                 | <i>mix</i>   | 0.00E+0      | 0.00E+0 | 0.00E+0 | 0.00E+0 | 2.18E-7 | 0.00E+0 | 3.81E-7 | 0.00E+0 |         |
| 10 <sup>6</sup> |                 | <i>trans</i> | 2.40E-6      | 1.60E-6 | 0.00E+0 | 0.00E+0 | 2.01E-5 | 0.00E+0 | 1.17E-4 | 8.00E-7 | 0.00E+0 | 3.00E-7 | 1.00E-6 | 5.00E-7 | 3.00E-7 | 1.15E-5 | 0.00E+0 | 1.50E-6 | 0.00E+0 | 0.00E+0 |         |
|                 |                 | <i>cis</i>   | 2.00E-7      | 5.00E-7 | 0.00E+0 | 0.00E+0 | 4.40E-6 | 0.00E+0 | 1.53E-5 | 2.00E-7 | 0.00E+0 | 0.00E+0 | 8.00E-7 | 8.00E-7 | 7.00E-7 | 1.10E-6 | 0.00E+0 | 1.00E-7 | 0.00E+0 | 0.00E+0 |         |
|                 |                 | <i>mix</i>   | 1.40E-6      | 1.10E-6 | 0.00E+0 | 0.00E+0 | 1.29E-5 | 0.00E+0 | 7.05E-5 | 5.27E-7 | 0.00E+0 | 1.63E-7 | 9.09E-7 | 6.37E-7 | 4.82E-7 | 6.76E-6 | 0.00E+0 | 8.62E-7 | 0.00E+0 | 0.00E+0 |         |
| 10 <sup>7</sup> |                 | <i>trans</i> | 7.56E-4      | 6.35E-4 | 2.39E-5 | 2.32E-5 | 3.52E-4 | 1.60E-6 | 4.49E-3 | 1.25E-5 | 4.50E-6 | 5.21E-5 | 6.85E-4 | 3.37E-4 | 1.33E-5 | 1.02E-3 | 0.00E+0 | 7.86E-5 | 0.00E+0 | 0.00E+0 |         |
|                 |                 | <i>cis</i>   | 1.41E-4      | 1.20E-4 | 5.80E-6 | 5.30E-6 | 1.04E-4 | 6.00E-7 | 8.91E-4 | 4.30E-6 | 1.60E-6 | 4.22E-5 | 8.00E-4 | 4.07E-4 | 4.19E-5 | 2.47E-4 | 0.00E+0 | 1.52E-5 | 0.00E+0 | 0.00E+0 |         |
|                 |                 | <i>mix</i>   | 4.76E-4      | 4.00E-4 | 1.57E-5 | 1.50E-5 | 2.39E-4 | 1.14E-6 | 2.85E-3 | 8.77E-6 | 3.18E-6 | 4.76E-5 | 7.37E-4 | 3.69E-4 | 2.63E-5 | 6.66E-4 | 0.00E+0 | 4.97E-5 | 0.00E+0 | 0.00E+0 |         |

| T<br>(K)        | P<br>(Pa)       | iso          | Z-i15        | i16     | i24     | i25     | i26     | i27     | i28     | i29     | i31     | E-i32   | Z-i32   | i33     | i34     | i35     | i36     | i37     |         |         |         |
|-----------------|-----------------|--------------|--------------|---------|---------|---------|---------|---------|---------|---------|---------|---------|---------|---------|---------|---------|---------|---------|---------|---------|---------|
| 1500            | 533             | <i>trans</i> | 0.00E+0      | 0.00E+0 | 0.00E+0 | 0.00E+0 | 0.00E+0 | 0.00E+0 | 0.00E+0 | 0.00E+0 | 0.00E+0 | 0.00E+0 | 0.00E+0 | 0.00E+0 | 0.00E+0 | 0.00E+0 | 0.00E+0 | 0.00E+0 | 0.00E+0 |         |         |
|                 |                 | <i>cis</i>   | 0.00E+0      | 0.00E+0 | 0.00E+0 | 0.00E+0 | 0.00E+0 | 0.00E+0 | 0.00E+0 | 0.00E+0 | 0.00E+0 | 0.00E+0 | 0.00E+0 | 0.00E+0 | 0.00E+0 | 0.00E+0 | 0.00E+0 | 0.00E+0 | 0.00E+0 | 0.00E+0 |         |
|                 |                 | <i>mix</i>   | 0.00E+0      | 0.00E+0 | 0.00E+0 | 0.00E+0 | 0.00E+0 | 0.00E+0 | 0.00E+0 | 0.00E+0 | 0.00E+0 | 0.00E+0 | 0.00E+0 | 0.00E+0 | 0.00E+0 | 0.00E+0 | 0.00E+0 | 0.00E+0 | 0.00E+0 | 0.00E+0 |         |
|                 | 10 <sup>4</sup> | <i>trans</i> | 1.00E-7      | 0.00E+0 |         |
|                 |                 | <i>cis</i>   | 0.00E+0      | 0.00E+0 | 0.00E+0 | 0.00E+0 | 0.00E+0 | 0.00E+0 | 0.00E+0 | 0.00E+0 | 0.00E+0 | 0.00E+0 | 0.00E+0 | 0.00E+0 | 0.00E+0 | 0.00E+0 | 0.00E+0 | 0.00E+0 | 0.00E+0 | 0.00E+0 |         |
|                 |                 | <i>mix</i>   | 5.49E-8      | 0.00E+0 |         |
|                 | 10 <sup>5</sup> | <i>trans</i> | 1.60E-6      | 0.00E+0 |         |
|                 |                 | <i>cis</i>   | 1.00E-7      | 0.00E+0 |         |
|                 |                 | <i>mix</i>   | 9.23E-7      | 0.00E+0 |         |
|                 | 10 <sup>6</sup> | <i>trans</i> | 7.33E-5      | 6.00E-7 | 0.00E+0 | 9.00E-7 | 1.80E-6 | 1.00E-7 | 6.90E-6 | 0.00E+0 | 2.00E-7 | 0.00E+0 | 0.00E+0 | 0.00E+0 | 0.00E+0 | 0.00E+0 | 0.00E+0 | 4.00E-7 | 0.00E+0 | 0.00E+0 |         |
|                 |                 | <i>cis</i>   | 7.80E-6      | 2.00E-7 | 0.00E+0 | 1.00E-6 | 1.20E-6 | 1.00E-7 | 5.10E-6 | 0.00E+0 |         |
|                 |                 | <i>mix</i>   | 4.37E-5      | 4.19E-7 | 0.00E+0 | 9.45E-7 | 1.53E-6 | 1.00E-7 | 6.09E-6 | 0.00E+0 | 1.10E-7 | 0.00E+0 | 0.00E+0 | 0.00E+0 | 0.00E+0 | 0.00E+0 | 0.00E+0 | 2.19E-7 | 0.00E+0 | 0.00E+0 |         |
|                 | 10 <sup>7</sup> | <i>trans</i> | 7.08E-4      | 1.46E-5 | 0.00E+0 | 2.75E-4 | 1.87E-4 | 2.05E-5 | 1.19E-3 | 4.00E-7 | 6.46E-5 | 1.10E-6 | 1.30E-6 | 0.00E+0 | 0.00E+0 | 0.00E+0 | 0.00E+0 | 1.25E-5 | 6.00E-7 | 0.00E+0 |         |
|                 |                 | <i>cis</i>   | 1.19E-4      | 2.50E-6 | 0.00E+0 | 1.59E-4 | 2.44E-4 | 1.38E-5 | 9.87E-4 | 1.00E-7 | 9.30E-6 | 5.00E-7 | 5.00E-7 | 0.00E+0 | 0.00E+0 | 0.00E+0 | 0.00E+0 | 2.80E-6 | 6.00E-7 | 0.00E+0 |         |
|                 |                 | <i>mix</i>   | 4.42E-4      | 9.14E-6 | 0.00E+0 | 2.23E-4 | 2.13E-4 | 1.75E-5 | 1.10E-3 | 2.65E-7 | 3.96E-5 | 8.29E-7 | 9.39E-7 | 0.00E+0 | 0.00E+0 | 0.00E+0 | 0.00E+0 | 8.12E-6 | 6.00E-7 | 0.00E+0 |         |
|                 | 1800            | 533          | <i>trans</i> | 0.00E+0 |         |
|                 |                 |              | <i>cis</i>   | 0.00E+0 |
|                 |                 |              | <i>mix</i>   | 0.00E+0 |
| 10 <sup>4</sup> |                 | <i>trans</i> | 0.00E+0      | 0.00E+0 | 0.00E+0 | 0.00E+0 | 0.00E+0 | 0.00E+0 | 0.00E+0 | 0.00E+0 | 0.00E+0 | 0.00E+0 | 0.00E+0 | 0.00E+0 | 0.00E+0 | 0.00E+0 | 0.00E+0 | 0.00E+0 | 0.00E+0 | 0.00E+0 |         |
|                 |                 | <i>cis</i>   | 0.00E+0      | 0.00E+0 | 0.00E+0 | 0.00E+0 | 0.00E+0 | 0.00E+0 | 0.00E+0 | 0.00E+0 | 0.00E+0 | 0.00E+0 | 0.00E+0 | 0.00E+0 | 0.00E+0 | 0.00E+0 | 0.00E+0 | 0.00E+0 | 0.00E+0 | 0.00E+0 |         |
|                 |                 | <i>mix</i>   | 0.00E+0      | 0.00E+0 | 0.00E+0 | 0.00E+0 | 0.00E+0 | 0.00E+0 | 0.00E+0 | 0.00E+0 | 0.00E+0 | 0.00E+0 | 0.00E+0 | 0.00E+0 | 0.00E+0 | 0.00E+0 | 0.00E+0 | 0.00E+0 | 0.00E+0 | 0.00E+0 |         |
| 10 <sup>5</sup> |                 | <i>trans</i> | 0.00E+0      | 0.00E+0 | 0.00E+0 | 0.00E+0 | 0.00E+0 | 0.00E+0 | 0.00E+0 | 0.00E+0 | 0.00E+0 | 0.00E+0 | 0.00E+0 | 0.00E+0 | 0.00E+0 | 0.00E+0 | 0.00E+0 | 0.00E+0 | 0.00E+0 | 0.00E+0 |         |
|                 |                 | <i>cis</i>   | 0.00E+0      | 0.00E+0 | 0.00E+0 | 0.00E+0 | 0.00E+0 | 0.00E+0 | 0.00E+0 | 0.00E+0 | 0.00E+0 | 0.00E+0 | 0.00E+0 | 0.00E+0 | 0.00E+0 | 0.00E+0 | 0.00E+0 | 0.00E+0 | 0.00E+0 | 0.00E+0 |         |
|                 |                 | <i>mix</i>   | 0.00E+0      | 0.00E+0 | 0.00E+0 | 0.00E+0 | 0.00E+0 | 0.00E+0 | 0.00E+0 | 0.00E+0 | 0.00E+0 | 0.00E+0 | 0.00E+0 | 0.00E+0 | 0.00E+0 | 0.00E+0 | 0.00E+0 | 0.00E+0 | 0.00E+0 | 0.00E+0 |         |
| 10 <sup>6</sup> |                 | <i>trans</i> | 2.30E-6      | 0.00E+0 | 0.00E+0 | 2.00E-7 | 0.00E+0 | 0.00E+0 | 3.00E-7 | 0.00E+0 |         |
|                 |                 | <i>cis</i>   | 4.00E-7      | 0.00E+0 | 0.00E+0 | 1.00E-7 | 0.00E+0 | 0.00E+0 | 2.00E-7 | 0.00E+0 |         |
|                 |                 | <i>mix</i>   | 1.43E-6      | 0.00E+0 | 0.00E+0 | 1.54E-7 | 0.00E+0 | 0.00E+0 | 2.54E-7 | 0.00E+0 |         |
| 10 <sup>7</sup> |                 | <i>trans</i> | 1.17E-4      | 3.60E-6 | 0.00E+0 | 2.39E-5 | 1.71E-5 | 1.80E-6 | 5.14E-5 | 0.00E+0 | 2.60E-6 | 1.00E-7 | 4.00E-7 | 0.00E+0 | 0.00E+0 | 0.00E+0 | 0.00E+0 | 3.30E-6 | 0.00E+0 | 0.00E+0 |         |
|                 |                 | <i>cis</i>   | 2.31E-5      | 8.00E-7 | 0.00E+0 | 1.88E-5 | 1.68E-5 | 2.70E-6 | 5.16E-5 | 0.00E+0 | 7.00E-7 | 1.00E-7 | 0.00E+0 | 0.00E+0 | 0.00E+0 | 0.00E+0 | 0.00E+0 | 8.00E-7 | 0.00E+0 | 0.00E+0 |         |
|                 |                 | <i>mix</i>   | 7.40E-5      | 2.32E-6 | 0.00E+0 | 2.16E-5 | 1.70E-5 | 2.21E-6 | 5.15E-5 | 0.00E+0 | 1.73E-6 | 1.00E-7 | 2.18E-7 | 0.00E+0 | 0.00E+0 | 0.00E+0 | 0.00E+0 | 2.16E-6 | 0.00E+0 | 0.00E+0 |         |

| T<br>(K)        | P<br>(Pa)       | iso          | i38          | i39     | i40     | i41     | i42     | i45     | <i>E</i> -βS | <i>Z</i> -βS | p1      | p2      | p3      | p4      | p5      | p6      | p8      | p10     |         |         |
|-----------------|-----------------|--------------|--------------|---------|---------|---------|---------|---------|--------------|--------------|---------|---------|---------|---------|---------|---------|---------|---------|---------|---------|
| 1500            | 533             | <i>trans</i> | 0.00E+0      | 0.00E+0 | 0.00E+0 | 0.00E+0 | 0.00E+0 | 0.00E+0 | 2.57E-2      | 2.04E-1      | 1.05E-2 | 2.65E-1 | 3.45E-1 | 6.74E-2 | 4.04E-4 | 3.05E-2 | 5.24E-2 | 1.36E-4 |         |         |
|                 |                 | <i>cis</i>   | 0.00E+0      | 0.00E+0 | 0.00E+0 | 0.00E+0 | 0.00E+0 | 0.00E+0 | 0.00E+0      | 8.83E-2      | 4.03E-2 | 2.59E-3 | 5.80E-1 | 8.61E-2 | 1.32E-2 | 6.09E-4 | 8.23E-2 | 1.06E-1 | 4.19E-4 |         |
|                 |                 | <i>mix</i>   | 0.00E+0      | 0.00E+0 | 0.00E+0 | 0.00E+0 | 0.00E+0 | 0.00E+0 | 0.00E+0      | 5.39E-2      | 1.30E-1 | 6.92E-3 | 4.07E-1 | 2.28E-1 | 4.29E-2 | 4.97E-4 | 5.39E-2 | 7.67E-2 | 2.64E-4 |         |
|                 | 10 <sup>4</sup> | <i>trans</i> | 0.00E+0      | 0.00E+0 | 0.00E+0 | 0.00E+0 | 0.00E+0 | 8.00E-7 | 2.57E-2      | 2.03E-1      | 1.05E-2 | 2.65E-1 | 3.45E-1 | 6.73E-2 | 3.93E-4 | 3.05E-2 | 5.24E-2 | 1.40E-4 |         |         |
|                 |                 | <i>cis</i>   | 0.00E+0      | 0.00E+0 | 0.00E+0 | 0.00E+0 | 0.00E+0 | 6.00E-7 | 8.83E-2      | 4.03E-2      | 2.61E-3 | 5.80E-1 | 8.60E-2 | 1.33E-2 | 6.20E-4 | 8.24E-2 | 1.06E-1 | 4.11E-4 |         |         |
|                 |                 | <i>mix</i>   | 0.00E+0      | 0.00E+0 | 0.00E+0 | 0.00E+0 | 0.00E+0 | 7.10E-7 | 5.40E-2      | 1.30E-1      | 6.95E-3 | 4.07E-1 | 2.28E-1 | 4.29E-2 | 4.95E-4 | 5.39E-2 | 7.67E-2 | 2.62E-4 |         |         |
|                 | 10 <sup>5</sup> | <i>trans</i> | 1.60E-6      | 1.20E-6 | 0.00E+0 | 0.00E+0 | 2.00E-7 | 1.42E-4 | 2.57E-2      | 2.03E-1      | 1.05E-2 | 2.65E-1 | 3.45E-1 | 6.70E-2 | 3.94E-4 | 3.04E-2 | 5.22E-2 | 1.35E-4 |         |         |
|                 |                 | <i>cis</i>   | 4.00E-7      | 2.00E-7 | 0.00E+0 | 0.00E+0 | 2.00E-7 | 1.79E-4 | 8.81E-2      | 4.03E-2      | 2.59E-3 | 5.80E-1 | 8.58E-2 | 1.32E-2 | 6.28E-4 | 8.24E-2 | 1.06E-1 | 4.20E-4 |         |         |
|                 |                 | <i>mix</i>   | 1.06E-6      | 7.49E-7 | 0.00E+0 | 0.00E+0 | 2.00E-7 | 1.59E-4 | 5.39E-2      | 1.30E-1      | 6.91E-3 | 4.08E-1 | 2.28E-1 | 4.27E-2 | 5.00E-4 | 5.39E-2 | 7.66E-2 | 2.64E-4 |         |         |
|                 | 10 <sup>6</sup> | <i>trans</i> | 1.93E-5      | 1.51E-4 | 1.00E-7 | 2.00E-7 | 5.57E-5 | 3.63E-3 | 2.54E-2      | 2.02E-1      | 9.83E-3 | 2.69E-1 | 3.42E-1 | 6.34E-2 | 3.84E-4 | 2.99E-2 | 4.86E-2 | 1.31E-4 |         |         |
|                 |                 | <i>cis</i>   | 1.04E-5      | 1.34E-4 | 1.00E-7 | 2.00E-7 | 5.23E-5 | 6.11E-3 | 8.78E-2      | 3.99E-2      | 2.46E-3 | 5.82E-1 | 8.47E-2 | 1.27E-2 | 5.99E-4 | 8.17E-2 | 1.00E-1 | 4.05E-4 |         |         |
|                 |                 | <i>mix</i>   | 1.53E-5      | 1.43E-4 | 1.00E-7 | 2.00E-7 | 5.42E-5 | 4.75E-3 | 5.36E-2      | 1.29E-1      | 6.50E-3 | 4.10E-1 | 2.26E-1 | 4.05E-2 | 4.81E-4 | 5.32E-2 | 7.19E-2 | 2.55E-4 |         |         |
|                 | 10 <sup>7</sup> | <i>trans</i> | 2.61E-5      | 2.57E-3 | 9.10E-6 | 3.29E-5 | 1.79E-3 | 1.18E-2 | 2.31E-2      | 1.89E-1      | 5.39E-3 | 2.62E-1 | 3.18E-1 | 3.66E-2 | 3.06E-4 | 2.57E-2 | 3.04E-2 | 1.05E-4 |         |         |
|                 |                 | <i>cis</i>   | 1.84E-5      | 4.51E-3 | 2.32E-5 | 2.07E-5 | 2.76E-3 | 2.60E-2 | 8.56E-2      | 3.64E-2      | 1.51E-3 | 5.83E-1 | 7.53E-2 | 7.72E-3 | 4.75E-4 | 7.69E-2 | 6.92E-2 | 3.32E-4 |         |         |
|                 |                 | <i>mix</i>   | 2.26E-5      | 3.45E-3 | 1.55E-5 | 2.74E-5 | 2.23E-3 | 1.82E-2 | 5.13E-2      | 1.20E-1      | 3.64E-3 | 4.07E-1 | 2.09E-1 | 2.36E-2 | 3.82E-4 | 4.88E-2 | 4.79E-2 | 2.08E-4 |         |         |
|                 | 1800            | 533          | <i>trans</i> | 0.00E+0 | 0.00E+0 | 0.00E+0 | 0.00E+0 | 0.00E+0 | 0.00E+0      | 4.00E-2      | 3.15E-1 | 9.44E-3 | 1.18E-1 | 3.91E-1 | 5.29E-2 | 9.76E-4 | 4.14E-2 | 3.14E-2 | 2.46E-4 |         |
|                 |                 |              | <i>cis</i>   | 0.00E+0 | 0.00E+0 | 0.00E+0 | 0.00E+0 | 0.00E+0 | 0.00E+0      | 0.00E+0      | 2.05E-1 | 6.26E-2 | 3.40E-3 | 3.70E-1 | 1.08E-1 | 1.29E-2 | 1.42E-3 | 1.52E-1 | 8.43E-2 | 1.03E-3 |
|                 |                 |              | <i>mix</i>   | 0.00E+0 | 0.00E+0 | 0.00E+0 | 0.00E+0 | 0.00E+0 | 0.00E+0      | 0.00E+0      | 1.15E-1 | 2.00E-1 | 6.69E-3 | 2.33E-1 | 2.62E-1 | 3.47E-2 | 1.18E-3 | 9.16E-2 | 5.55E-2 | 6.02E-4 |
| 10 <sup>4</sup> |                 | <i>trans</i> | 0.00E+0      | 0.00E+0 | 0.00E+0 | 0.00E+0 | 0.00E+0 | 0.00E+0 | 4.00E-2      | 3.15E-1      | 9.43E-3 | 1.18E-1 | 3.91E-1 | 5.31E-2 | 9.69E-4 | 4.13E-2 | 3.14E-2 | 2.49E-4 |         |         |
|                 |                 | <i>cis</i>   | 0.00E+0      | 0.00E+0 | 0.00E+0 | 0.00E+0 | 0.00E+0 | 0.00E+0 | 2.05E-1      | 6.26E-2      | 3.38E-3 | 3.70E-1 | 1.08E-1 | 1.29E-2 | 1.40E-3 | 1.52E-1 | 8.44E-2 | 1.04E-3 |         |         |
|                 |                 | <i>mix</i>   | 0.00E+0      | 0.00E+0 | 0.00E+0 | 0.00E+0 | 0.00E+0 | 0.00E+0 | 1.15E-1      | 2.00E-1      | 6.67E-3 | 2.33E-1 | 2.62E-1 | 3.48E-2 | 1.17E-3 | 9.16E-2 | 5.55E-2 | 6.08E-4 |         |         |
| 10 <sup>5</sup> |                 | <i>trans</i> | 0.00E+0      | 0.00E+0 | 0.00E+0 | 0.00E+0 | 0.00E+0 | 1.90E-6 | 4.00E-2      | 3.15E-1      | 9.40E-3 | 1.18E-1 | 3.90E-1 | 5.30E-2 | 9.99E-4 | 4.15E-2 | 3.14E-2 | 2.53E-4 |         |         |
|                 |                 | <i>cis</i>   | 0.00E+0      | 0.00E+0 | 0.00E+0 | 0.00E+0 | 0.00E+0 | 3.10E-6 | 2.05E-1      | 6.26E-2      | 3.39E-3 | 3.70E-1 | 1.08E-1 | 1.29E-2 | 1.43E-3 | 1.51E-1 | 8.42E-2 | 1.00E-3 |         |         |
|                 |                 | <i>mix</i>   | 0.00E+0      | 0.00E+0 | 0.00E+0 | 0.00E+0 | 0.00E+0 | 2.45E-6 | 1.15E-1      | 2.00E-1      | 6.66E-3 | 2.33E-1 | 2.62E-1 | 3.47E-2 | 1.20E-3 | 9.16E-2 | 5.55E-2 | 5.94E-4 |         |         |
| 10 <sup>6</sup> |                 | <i>trans</i> | 2.70E-6      | 2.80E-6 | 0.00E+0 | 1.00E-7 | 1.20E-6 | 2.34E-4 | 3.99E-2      | 3.15E-1      | 9.40E-3 | 1.19E-1 | 3.90E-1 | 5.28E-2 | 9.66E-4 | 4.13E-2 | 3.12E-2 | 2.46E-4 |         |         |
|                 |                 | <i>cis</i>   | 1.10E-6      | 2.00E-6 | 0.00E+0 | 0.00E+0 | 1.40E-6 | 4.29E-4 | 2.05E-1      | 6.25E-2      | 3.36E-3 | 3.71E-1 | 1.08E-1 | 1.28E-2 | 1.43E-3 | 1.51E-1 | 8.39E-2 | 1.02E-3 |         |         |
|                 |                 | <i>mix</i>   | 1.97E-6      | 2.44E-6 | 0.00E+0 | 5.45E-8 | 1.29E-6 | 3.23E-4 | 1.15E-1      | 2.00E-1      | 6.65E-3 | 2.33E-1 | 2.62E-1 | 3.46E-2 | 1.18E-3 | 9.15E-2 | 5.52E-2 | 5.99E-4 |         |         |
| 10 <sup>7</sup> |                 | <i>trans</i> | 2.33E-5      | 3.13E-4 | 2.40E-6 | 4.90E-6 | 1.66E-4 | 3.67E-3 | 3.93E-2      | 3.12E-1      | 8.65E-3 | 1.23E-1 | 3.87E-1 | 4.92E-2 | 9.24E-4 | 4.01E-2 | 2.76E-2 | 2.27E-4 |         |         |
|                 |                 | <i>cis</i>   | 1.91E-5      | 5.08E-4 | 3.70E-6 | 3.10E-6 | 2.53E-4 | 9.07E-3 | 2.03E-1      | 6.12E-2      | 3.14E-3 | 3.76E-1 | 1.06E-1 | 1.21E-2 | 1.34E-3 | 1.49E-1 | 7.50E-2 | 9.54E-4 |         |         |
|                 |                 | <i>mix</i>   | 2.14E-5      | 4.02E-4 | 2.99E-6 | 4.08E-6 | 2.06E-4 | 6.13E-3 | 1.14E-1      | 1.98E-1      | 6.14E-3 | 2.38E-1 | 2.59E-1 | 3.23E-2 | 1.11E-3 | 8.99E-2 | 4.92E-2 | 5.58E-4 |         |         |
